# Supplementary material for: Identification of a Novel Model for Predicting the Prognosis and Immune Response Based on Genes Related to Cuproptosis and Ferroptosis in Ovarian Cancer
Source: MDPI journal article supplement (doi:10.3390/cancers15030579), 2023-01-18
Supplement: s1 [file s1]

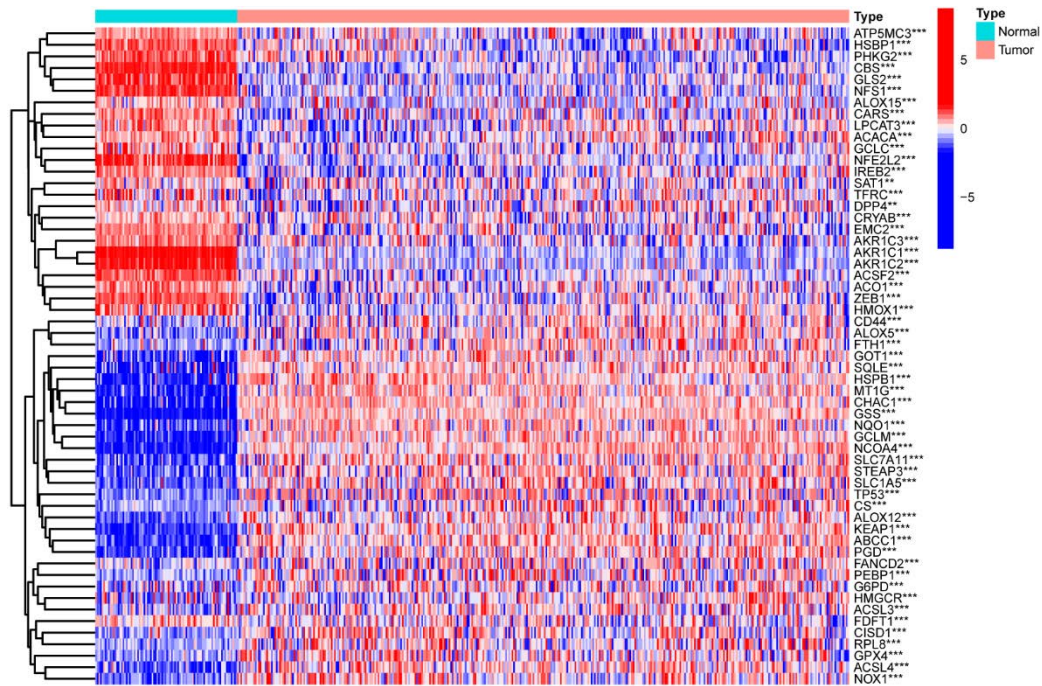

**Supplementary Figure S1.** Based on TCGA-OV and GTEx-ovary, 57 differentially expressed ferroptosis-related genes were identified.

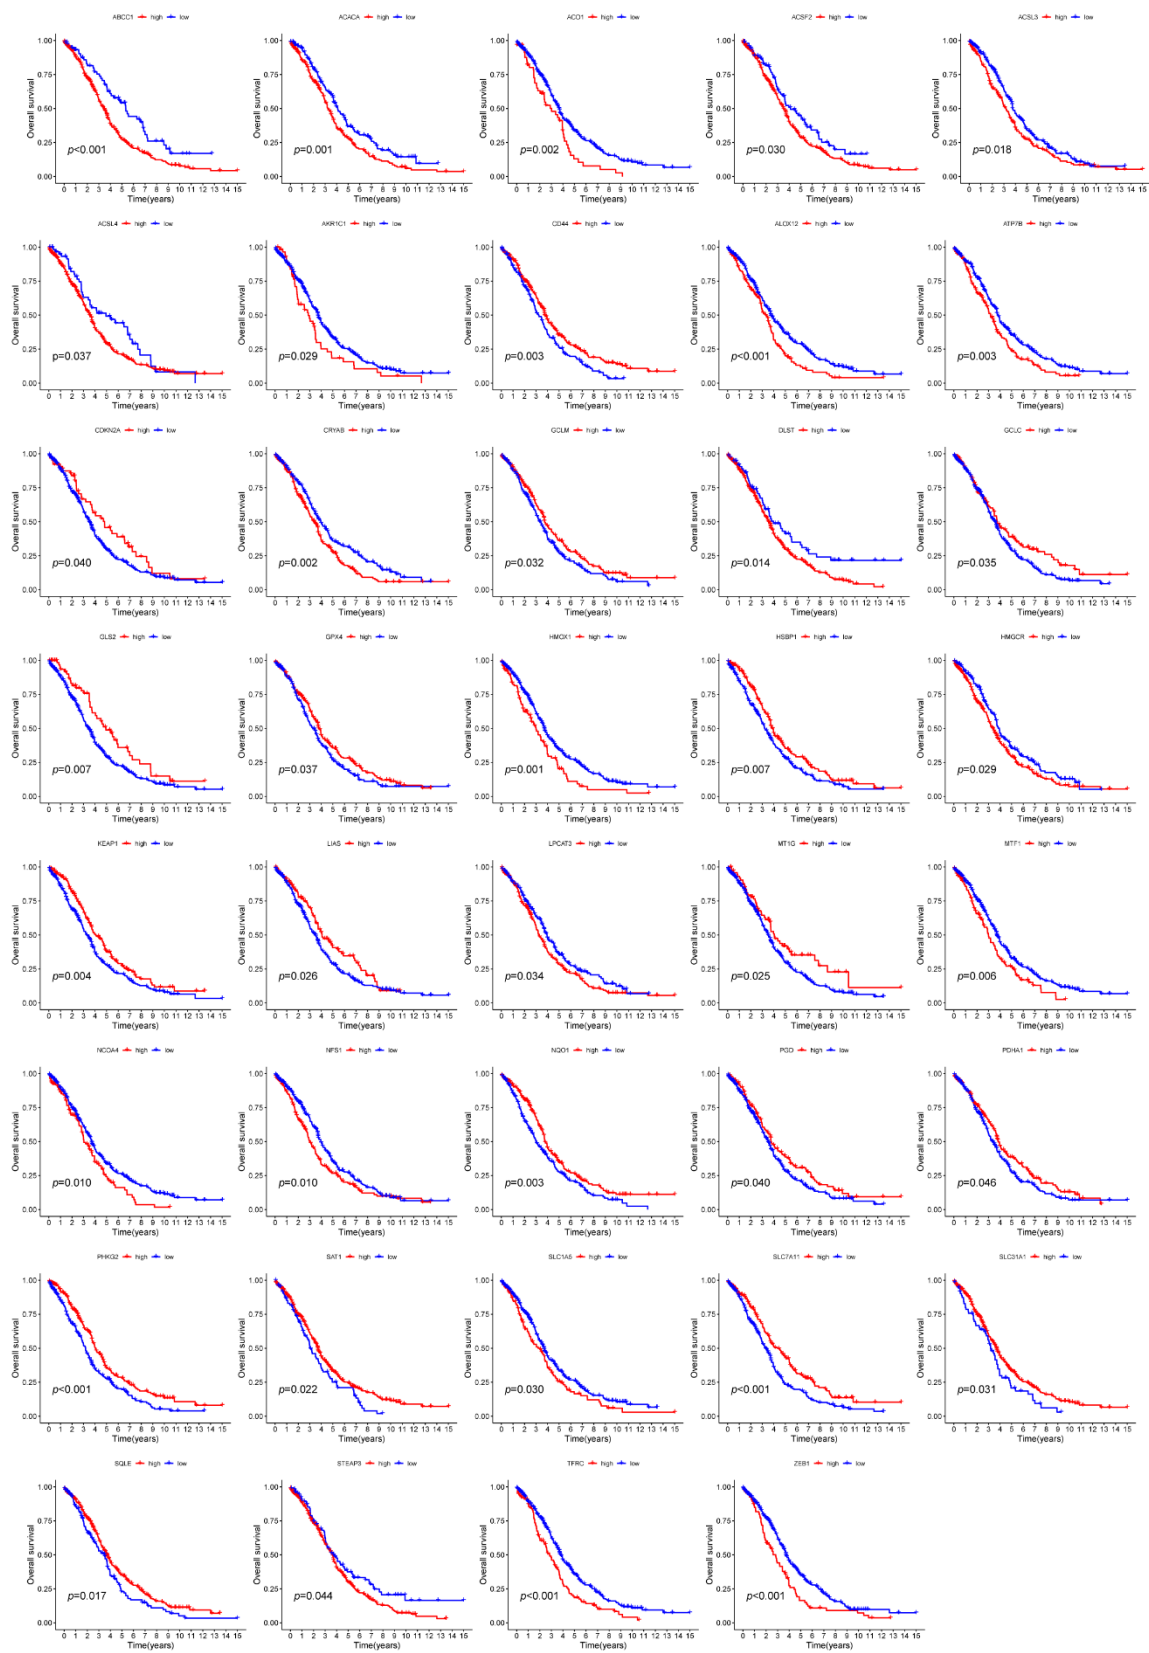

**Supplementary Figure S2.** 39 prognosis-related genes (*PRGs*) were identified for our subsequent analysis.

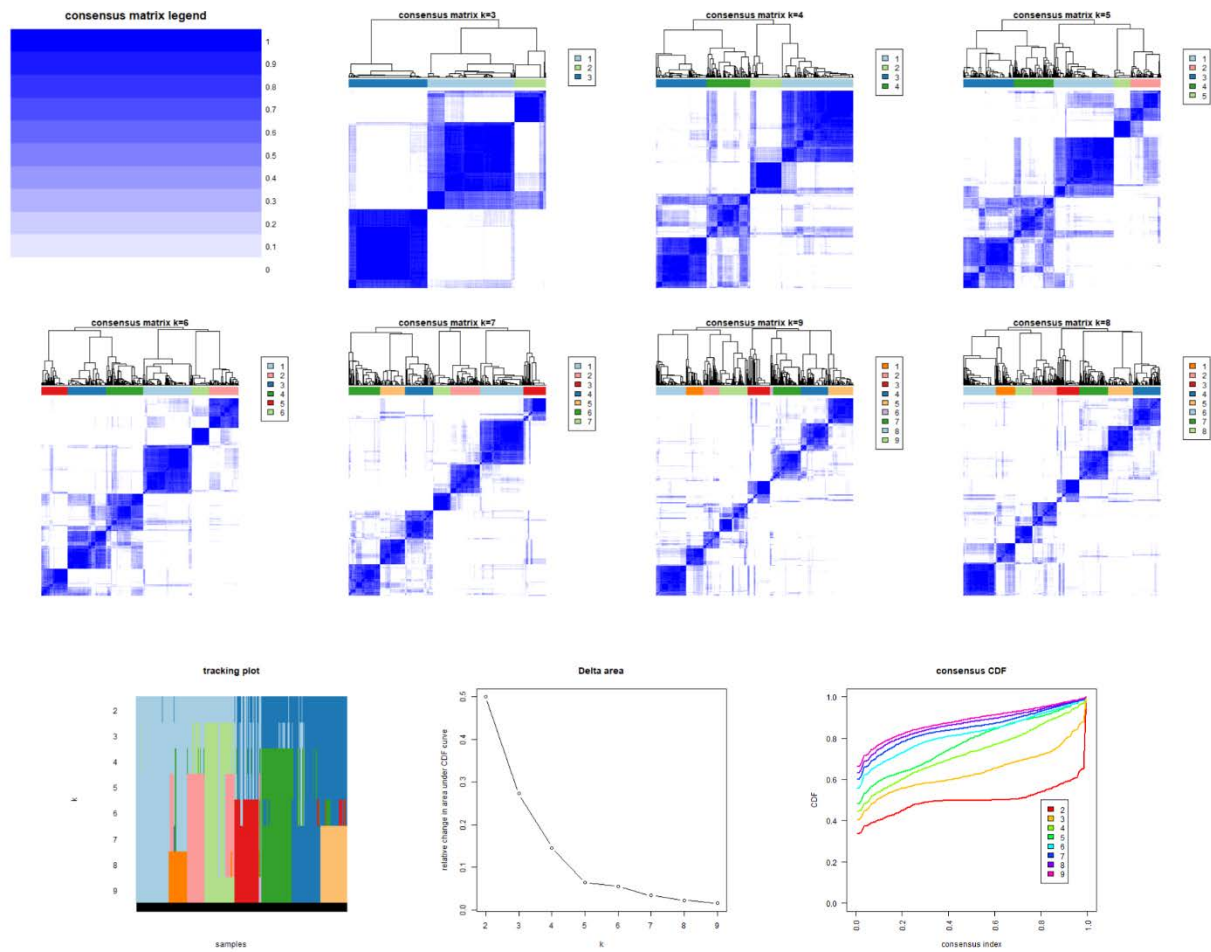

**Supplementary Figure S3.** Consensus matrixes for all samples were clustered into an appropriate number of prognosis-related clusters ( $k=1-9$ ).

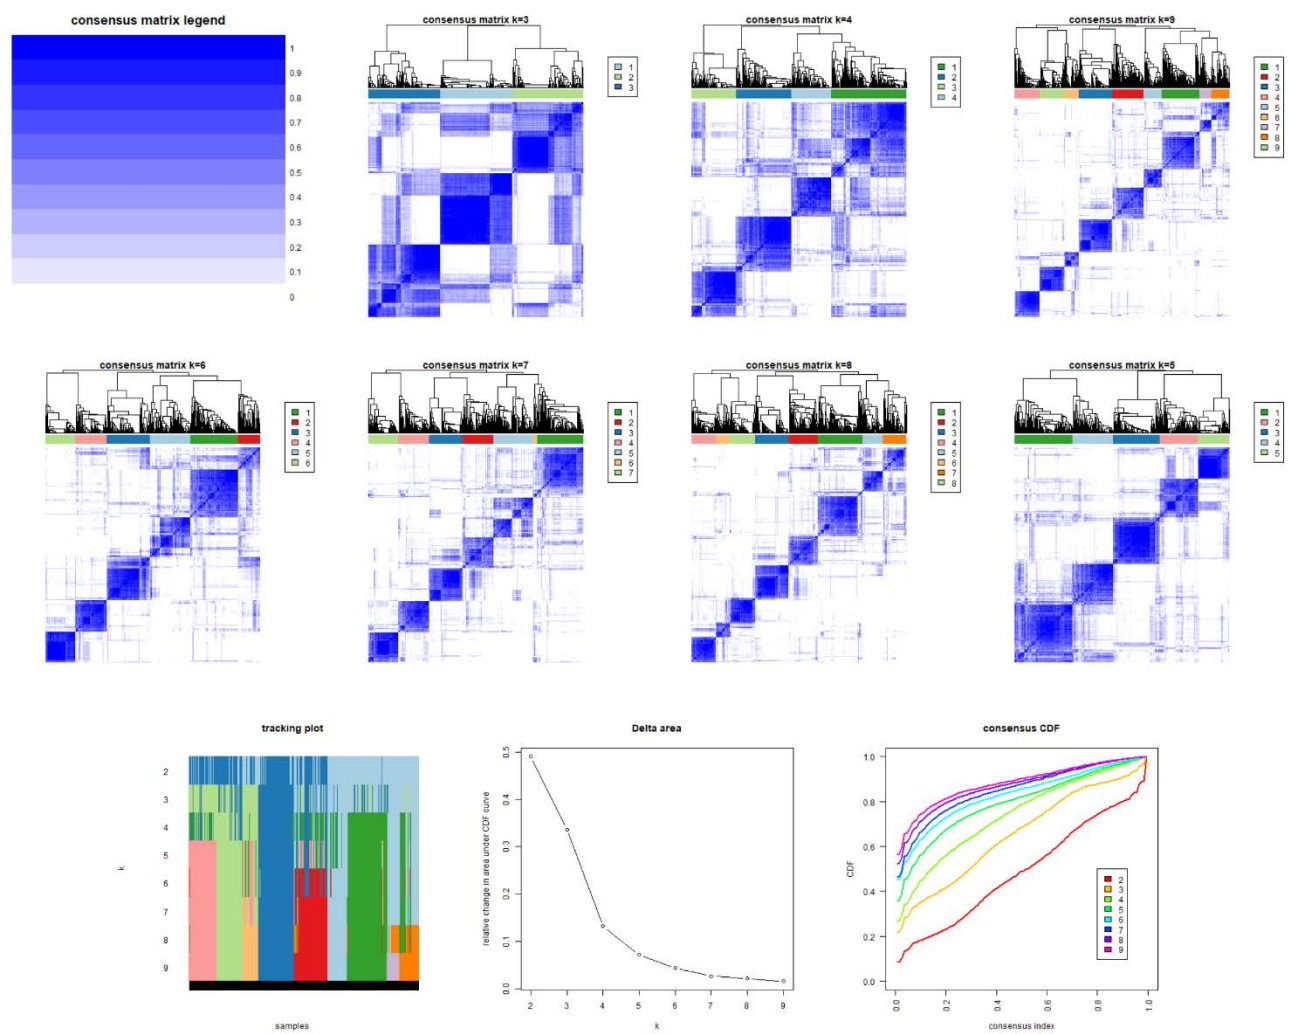

**Supplementary Figure S4:** Consensus matrix identifies different gene clusters ( $k = 1-9$ ).

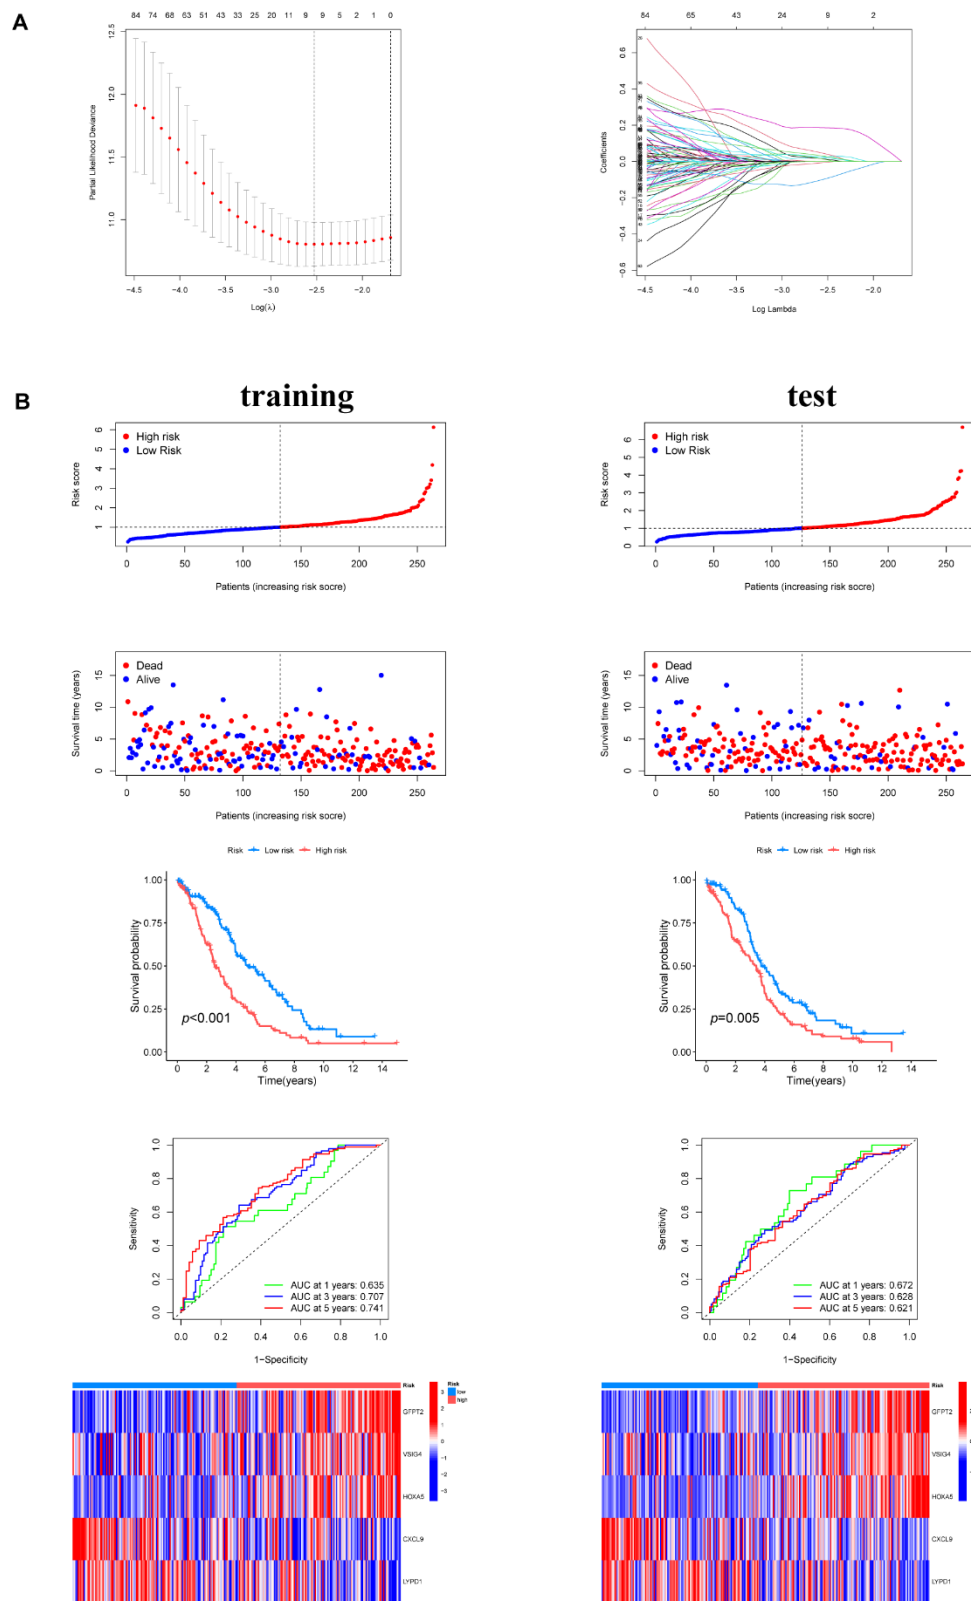

**Supplementary Figure S5: Construction of risk model. (A)** Minimal crossover validation points show the number of hub genes and the trajectory of each independent variable based on the training set. **(B)** Risk model identification in training and test cohorts.

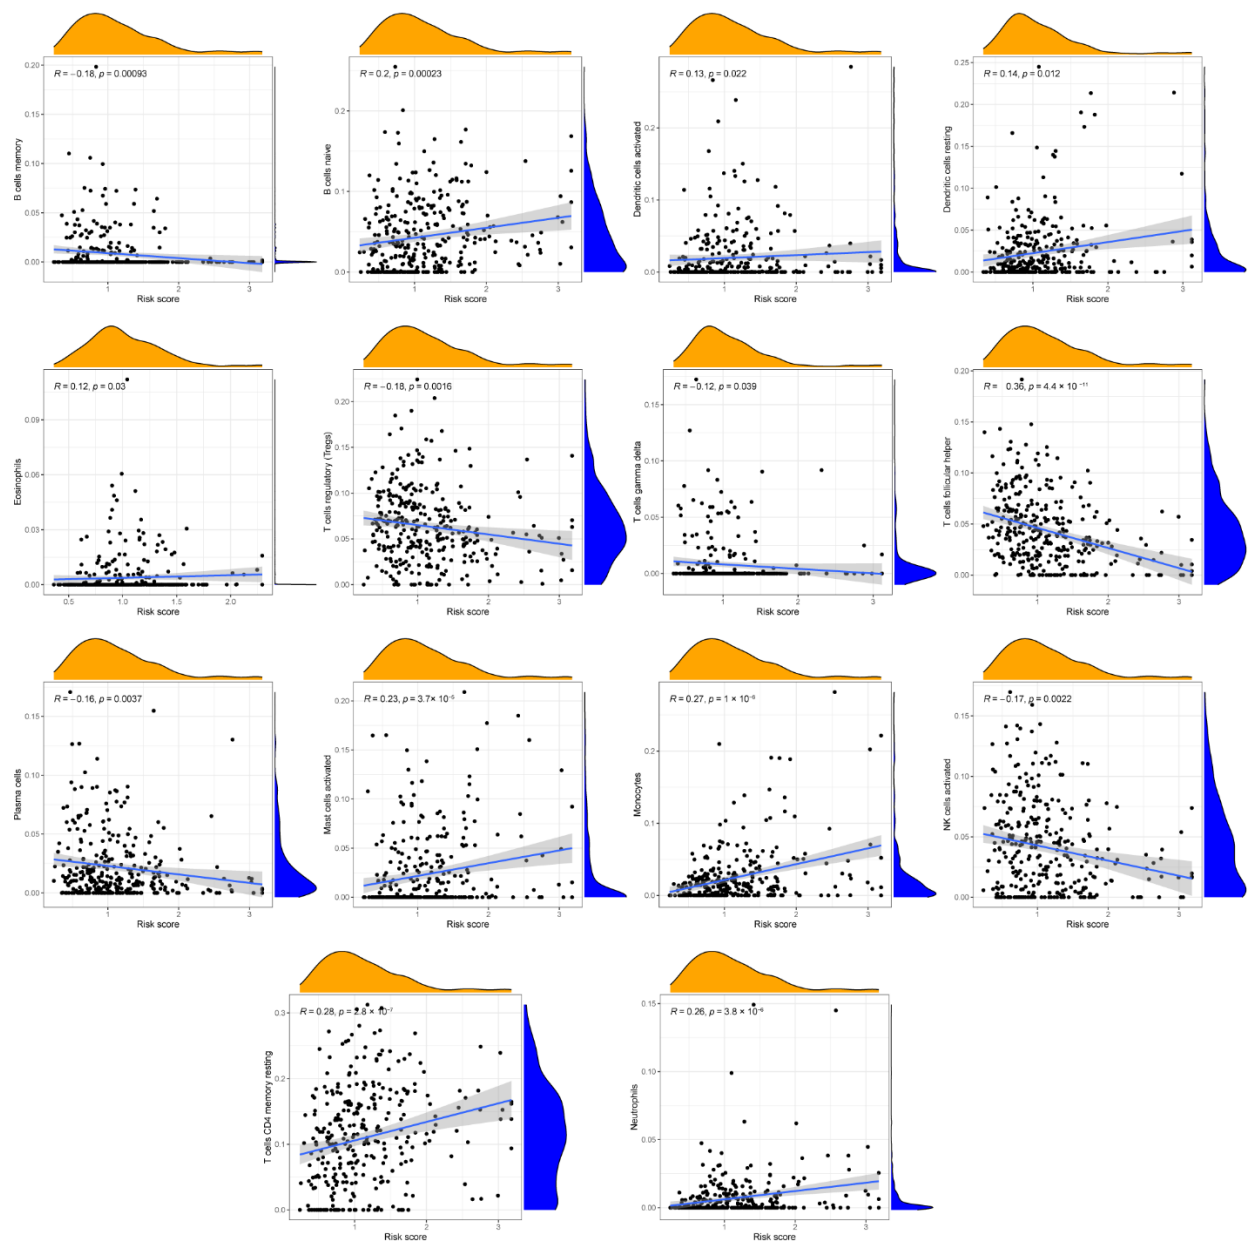

**Supplementary Figure S6:** The association between risk score and immune cells.
