# Supplementary material for: Identification of a Novel Model for Predicting the Prognosis and Immune Response Based on Genes Related to Cuproptosis and Ferroptosis in Ovarian Cancer
Source: Cancers (Basel). 2023 Jan 18;15(3):579. doi: 10.3390/cancers15030579 (PMC9913847; doi:10.3390/cancers15030579)
Supplement: Supplementary file 1 [file cancers-15-00579-s001.zip]

Archive with 6 entries (6 files):
- Supplementary Figures.pdf
- Supplementary File S1.tif
- Supplementary Table 1.xlsx
- Supplementary Table 2.xlsx
- Supplementary Table 3.xlsx
- Supplementary Table 4.xlsx
