# Supplementary material for: Identification of a Novel Model for Predicting the Prognosis and Immune Response Based on Genes Related to Cuproptosis and Ferroptosis in Ovarian Cancer
Source: Cancers (Basel). 2023 Jan 18;15(3):579. doi: 10.3390/cancers15030579 (PMC9913847; doi:10.3390/cancers15030579)
Supplement: Supplementary file 1 [file cancers-15-00579-s001.zip › Supplementary Table 1.xlsx]

## Sheet: clinical information 
Clinical information of the OC patients included in this study
Characteristics	TCGA-OV+GSE26712
Number of patients	561
Gender	Female
Age
≤65	259
>65	117
unknow	185
Grade
G1	4
G2	37
G3	288
G4	1
unknow	231
Stage
Stage I	1
Stage II	22
Stage III	293
Stage III-IV	185
Stage IV	57
unknow	3
T	NA
M	NA
N	NA
Tumor residul
No Macroscopic disease	65
1-10mm	169
10-20mm	24
>20mm	68
unknow	235
Survival status
dead	360
alive	169
no evidence of disease	32
OS days (median, range)	1073 (8, 4928)
