# Supplementary material for: Identification of a Novel Model for Predicting the Prognosis and Immune Response Based on Genes Related to Cuproptosis and Ferroptosis in Ovarian Cancer
Source: Cancers (Basel). 2023 Jan 18;15(3):579. doi: 10.3390/cancers15030579 (PMC9913847; doi:10.3390/cancers15030579)
Supplement: Supplementary file 1 [file cancers-15-00579-s001.zip › Supplementary Table 2.xlsx]

## Sheet: 16 CRGs and 60 FRGs
Gene	Type
ATP7B	Cuproptosis
ATP7A	Cuproptosis
SLC31A1	Cuproptosis
FDX1	Cuproptosis
LIAS	Cuproptosis
LIPT1	Cuproptosis
DLD	Cuproptosis
DLAT	Cuproptosis
PDHA1	Cuproptosis
PDHB	Cuproptosis
MTF1	Cuproptosis
GLS	Cuproptosis
CDKN2A	Cuproptosis
DBT	Cuproptosis
GCSH	Cuproptosis
DLST	Cuproptosis
ACSL4	Ferroptosis
AKR1C1	Ferroptosis
AKR1C2	Ferroptosis
AKR1C3	Ferroptosis
ALOX15	Ferroptosis
ALOX5	Ferroptosis
ALOX12	Ferroptosis
ATP5MC3	Ferroptosis
CARS	Ferroptosis
CBS	Ferroptosis
CD44	Ferroptosis
CHAC1	Ferroptosis
CISD1	Ferroptosis
CS	Ferroptosis
DPP4	Ferroptosis
FANCD2	Ferroptosis
GCLC	Ferroptosis
GCLM	Ferroptosis
GLS2	Ferroptosis
GPX4	Ferroptosis
GSS	Ferroptosis
HMGCR	Ferroptosis
HSPB1	Ferroptosis
CRYAB	Ferroptosis
LPCAT3	Ferroptosis
MT1G	Ferroptosis
NCOA4	Ferroptosis
PTGS2	Ferroptosis
RPL8	Ferroptosis
SAT1	Ferroptosis
SLC7A11	Ferroptosis
FDFT1	Ferroptosis
TFRC	Ferroptosis
TP53	Ferroptosis
EMC2	Ferroptosis
AIFM2	Ferroptosis
PHKG2	Ferroptosis
HSBP1	Ferroptosis
ACO1	Ferroptosis
FTH1	Ferroptosis
STEAP3	Ferroptosis
NFS1	Ferroptosis
ACSL3	Ferroptosis
ACACA	Ferroptosis
PEBP1	Ferroptosis
ZEB1	Ferroptosis
SQLE	Ferroptosis
FADS2	Ferroptosis
NFE2L2	Ferroptosis
KEAP1	Ferroptosis
NQO1	Ferroptosis
NOX1	Ferroptosis
ABCC1	Ferroptosis
SLC1A5	Ferroptosis
GOT1	Ferroptosis
G6PD	Ferroptosis
PGD	Ferroptosis
IREB2	Ferroptosis
HMOX1	Ferroptosis
ACSF2	Ferroptosis
