# Supplementary material for: Identification of a Novel Model for Predicting the Prognosis and Immune Response Based on Genes Related to Cuproptosis and Ferroptosis in Ovarian Cancer
Source: Cancers (Basel). 2023 Jan 18;15(3):579. doi: 10.3390/cancers15030579 (PMC9913847; doi:10.3390/cancers15030579)
Supplement: Supplementary file 1 [file cancers-15-00579-s001.zip › Supplementary Table 3.xlsx]

## Sheet: KM analysis 
id	HR	HR.95L	HR.95H	km pvalue
TFRC	1.17401	1.04814	1.31499	0.000147728
SLC7A11	0.759031	0.648943	0.887794	0.000210775
PHKG2	0.667415	0.512376	0.869367	0.000274287
ABCC1	1.21884	1.01207	1.46787	0.000613605
ZEB1	1.3521	1.11528	1.63921	0.00062018
ALOX12	1.56482	1.24872	1.96095	0.000805781
ACACA	1.40808	1.14485	1.73183	0.00100903
HMOX1	1.15187	1.02069	1.29992	0.00133316
ACO1	1.29291	1.04207	1.60413	0.00216616
CRYAB	1.08162	1.00752	1.16116	0.00233032
NQO1	0.954432	0.864069	1.05424	0.00278587
ATP7B	1.14353	0.990539	1.32016	0.00280893
CD44	0.944324	0.822042	1.0848	0.00347989
KEAP1	0.761726	0.635814	0.912573	0.00434962
MTF1	1.14468	0.914339	1.43304	0.00617473
HSBP1	0.831056	0.69103	0.999456	0.00655341
GLS2	0.760143	0.503467	1.14768	0.00665888
NFS1	1.30565	1.01754	1.67533	0.00965237
NCOA4	1.13513	0.932927	1.38115	0.00975612
DLST	1.1093	0.901858	1.36446	0.0142804
SQLE	0.928314	0.80111	1.07572	0.0171489
ACSL3	1.12906	0.894033	1.42586	0.0181753
SAT1	0.898821	0.807204	1.00084	0.0222667
MT1G	0.982373	0.930069	1.03762	0.0251158
LIAS	0.898231	0.726923	1.10991	0.0264352
AKR1C1	1.18593	0.89943	1.5637	0.0287717
HMGCR	1.04477	0.870179	1.25439	0.0290025
ACSF2	1.07487	0.931266	1.24062	0.0298221
SLC1A5	1.03017	0.884322	1.20008	0.0304774
SLC31A1	0.967587	0.809111	1.1571	0.0305153
GCLM	0.958143	0.804316	1.14139	0.0320237
LPCAT3	1.17512	0.970927	1.42226	0.0342206
GCLC	0.914245	0.732742	1.14071	0.0349071
ACSL4	1.04553	0.898574	1.21652	0.0369234
GPX4	0.951336	0.806059	1.1228	0.0370323
CDKN2A	0.951762	0.894008	1.01325	0.0399559
PGD	0.939605	0.810119	1.08979	0.0404257
STEAP3	1.09925	0.972862	1.24207	0.0443324
PDHA1	0.918759	0.773625	1.09112	0.0459053

## Sheet: PRGs
Gene	Type
ATP7B	Cuproptosis
MTF1	Cuproptosis
DLST	Cuproptosis
LIAS	Cuproptosis
SLC31A1	Cuproptosis
CDKN2A	Cuproptosis
PDHA1	Cuproptosis
TFRC	Ferrotosis
SLC7A11	Ferrotosis
PHKG2	Ferrotosis
ABCC1	Ferrotosis
ZEB1	Ferrotosis
ALOX12	Ferrotosis
ACACA	Ferrotosis
HMOX1	Ferrotosis
ACO1	Ferrotosis
CRYAB	Ferrotosis
NQO1	Ferrotosis
CD44	Ferrotosis
KEAP1	Ferrotosis
HSBP1	Ferrotosis
GLS2	Ferrotosis
NFS1	Ferrotosis
NCOA4	Ferrotosis
SQLE	Ferrotosis
ACSL3	Ferrotosis
SAT1	Ferrotosis
MT1G	Ferrotosis
AKR1C1	Ferrotosis
HMGCR	Ferrotosis
ACSF2	Ferrotosis
SLC1A5	Ferrotosis
GCLM	Ferrotosis
LPCAT3	Ferrotosis
GCLC	Ferrotosis
ACSL4	Ferrotosis
GPX4	Ferrotosis
PGD	Ferrotosis
STEAP3	Ferrotosis
