# Supplementary material for: Identification of a Novel Model for Predicting the Prognosis and Immune Response Based on Genes Related to Cuproptosis and Ferroptosis in Ovarian Cancer
Source: Cancers (Basel). 2023 Jan 18;15(3):579. doi: 10.3390/cancers15030579 (PMC9913847; doi:10.3390/cancers15030579)
Supplement: Supplementary file 1 [file cancers-15-00579-s001.zip › Supplementary Table 4.xlsx]

## Sheet: risk all samples
id	futime	fustat	GFPT2	VSIG4	HOXA5	CXCL9	LYPD1	riskScore	risk
TCGA-04-1331	3.66027	1	3.24134	3.63446	2.50904	3.4079	4.42032	1.12519	high
TCGA-04-1350	5.33151	1	1.80311	2.85147	3.11932	3.53706	8.37427	0.50396	low
TCGA-04-1361	2.70959	0	2.12932	3.38087	2.00083	3.46692	3.13928	0.805849	low
TCGA-04-1362	3.69315	1	1.9256	4.28056	4.34377	2.72314	4.35097	1.29766	high
TCGA-04-1519	0.0657534	0	1.77033	3.06375	1.62427	1.88592	8.20302	0.672458	low
TCGA-04-1651	3.01918	1	2.29747	3.91183	3.66765	3.43745	7.42065	0.838263	low
TCGA-09-0364	2.43014	1	2.9214	2.76979	3.99478	1.54096	5.40057	1.46866	high
TCGA-09-1659	0.832877	1	2.83222	5.29708	1.75117	2.28132	7.15134	1.43178	high
TCGA-09-1661	3.20274	1	2.14084	3.77036	4.05583	2.00972	6.0077	1.26537	high
TCGA-09-1662	7.44384	1	3.11021	5.47403	4.21078	3.92382	8.15439	1.3034	high
TCGA-09-1668	4.6137	0	3.15955	4.05006	2.67259	6.6439	8.07173	0.433563	low
TCGA-09-1669	2.54247	0	2.08426	4.62121	3.06556	6.47098	7.09356	0.425373	low
TCGA-09-2044	0.509589	0	2.36511	5.58453	2.04854	3.87044	7.2215	0.938518	low
TCGA-09-2045	2.92877	1	2.19321	4.25369	3.09917	2.44264	6.71716	1.10207	high
TCGA-09-2048	0.378082	1	2.42709	4.11467	3.96914	2.25267	5.52456	1.42306	high
TCGA-09-2053	3.31233	0	2.37962	4.81704	6.45688	6.06531	8.10262	0.705494	low
TCGA-09-2056	1.03836	0	2.65498	4.63094	1.63916	3.54397	7.40152	0.84836	low
TCGA-13-0720	3.71233	1	3.65313	3.00842	3.45911	3.20762	6.26436	1.12217	high
TCGA-13-0724	0.227397	1	3.10552	3.87271	5.82411	2.37702	6.85154	1.74699	high
TCGA-13-0725	1.03288	1	2.90164	5.29749	4.0273	3.13251	5.92922	1.64692	high
TCGA-13-0727	1.26575	1	2.76954	5.01605	6.49547	1.95498	4.69935	2.81133	high
TCGA-13-0768	4.88767	1	5.31123	5.98682	3.55339	7.42229	5.14474	1.31371	high
TCGA-13-0797	5.81096	0	1.91103	4.10626	3.37303	3.31504	6.36608	0.845844	low
TCGA-13-0884	8.93151	1	3.00464	4.06885	5.05465	4.45165	5.1108	1.12081	high
TCGA-13-0886	12.7808	0	3.42719	5.21107	3.43092	4.72642	6.67037	1.13251	high
TCGA-13-0888	7.70137	1	2.31928	2.40156	4.05163	1.53639	4.62911	1.22606	high
TCGA-13-0891	8.56986	1	2.53867	2.82313	1.80716	3.0384	2.65242	0.899517	low
TCGA-13-0893	3.6137	1	2.86404	4.32949	2.81358	5.03616	1.75517	0.990872	low
TCGA-13-0897	5.97808	1	2.67468	4.73898	2.79476	5.61529	7.2485	0.605015	low
TCGA-13-0900	11.1699	0	3.85827	4.74062	2.7484	5.81967	6.50785	0.833516	low
TCGA-13-0901	1.6137	0	3.41077	4.51657	3.42776	2.62054	6.24881	1.6637	high
TCGA-13-0906	9.91507	0	2.41459	3.40687	2.65171	5.29264	6.6336	0.47221	low
TCGA-13-0913	9.10959	0	1.76217	3.61001	3.4941	5.14464	7.17483	0.450066	low
TCGA-13-0916	4.89041	0	2.2264	3.73823	1.95129	5.54202	6.11253	0.436813	low
TCGA-13-0920	4.06575	1	2.57389	2.6585	1.6154	3.98615	7.70849	0.478865	low
TCGA-13-0923	6.97808	0	2.4534	4.36039	1.62394	3.4205	7.42065	0.778809	low
TCGA-13-1403	6.42466	1	3.1026	3.75949	2.43495	1.87654	8.1387	1.22833	high
TCGA-13-1405	2.37808	1	3.59841	4.83679	3.39014	4.66407	4.641	1.27799	high
TCGA-13-1407	6.94247	0	1.76903	2.22268	1.59968	1.89755	7.25311	0.59791	low
TCGA-13-1409	4.7726	1	2.16794	2.08984	6.09318	1.58086	8.19208	1.05085	high
TCGA-13-1411	1.45479	1	3.95995	7.21619	2.92779	6.13226	7.45084	1.28243	high
TCGA-13-1487	1.86575	1	3.33745	3.8083	2.59595	3.47447	5.78762	1.08085	high
TCGA-13-1488	5.90137	1	3.05175	3.63586	2.43967	5.88056	6.52226	0.504355	low
TCGA-13-1489	6.99452	1	3.65717	3.20832	1.9738	2.99554	6.49814	1.0376	high
TCGA-13-1495	7.53151	1	2.72118	4.17237	2.74203	4.58575	8.1387	0.650122	low
TCGA-13-1496	0.353425	1	1.76936	5.78017	1.9634	5.2311	5.53489	0.669163	low
TCGA-13-1498	5.51233	1	3.20241	4.79723	2.44931	5.25867	8.28228	0.69075	low
TCGA-13-1505	5.47397	0	3.45894	3.77688	3.10022	4.03658	8.06693	0.870341	low
TCGA-13-1507	5.46027	1	3.34248	6.04528	3.07095	5.62499	6.79186	1.01584	high
TCGA-13-1509	6.67945	0	3.98146	5.14184	3.08234	4.87083	5.86219	1.27884	high
TCGA-13-1511	4.52055	1	2.78118	4.12979	2.16162	2.20092	6.18011	1.25619	high
TCGA-13-1512	1.21096	0	3.01586	4.26938	2.36566	4.84569	8.5249	0.631702	low
TCGA-20-0991	2.18356	0	2.18685	6.92493	2.01589	7.59701	6.08098	0.523207	low
TCGA-20-1682	2.29315	0	3.80652	5.15602	4.19758	5.5056	3.45827	1.39867	high
TCGA-20-1687	0.221918	0	3.93749	4.64382	2.6933	4.30801	5.54214	1.27801	high
TCGA-23-1023	3.37808	0	2.83481	5.35594	1.7122	4.53296	5.61281	0.936251	low
TCGA-23-1026	2.23562	0	3.63232	5.92761	3.90259	5.0151	6.51613	1.38203	high
TCGA-23-1028	4.11781	0	2.3901	3.30578	1.88968	5.14746	6.62704	0.438957	low
TCGA-23-1029	0.734247	0	2.3261	4.40785	1.69912	2.77166	7.60907	0.883736	low
TCGA-23-1030	2.4274	0	3.49026	3.79714	3.11868	3.96342	6.74787	0.986631	low
TCGA-23-1107	0.0246575	1	2.06323	4.88206	5.13895	3.04198	5.81584	1.39031	high
TCGA-23-1110	4.54247	0	2.49967	2.4126	1.6643	1.72391	3.95223	1.0062	high
TCGA-23-1113	2.6	1	2.2809	4.11568	2.05018	1.74318	6.79655	1.15495	high
TCGA-23-1118	7.16712	0	2.51282	4.76014	3.31916	4.78334	7.49401	0.738099	low
TCGA-23-1123	2.78904	1	2.35026	6.46573	1.59759	4.97788	5.92346	0.902141	low
TCGA-23-2077	9.65753	0	2.5082	4.97905	1.60906	3.56613	4.83984	1.04261	high
TCGA-24-1103	4.50959	1	2.83398	3.05695	1.70201	2.64203	7.83073	0.773654	low
TCGA-24-1104	5.29589	1	2.719	5.17023	1.59521	4.52765	2.84464	1.04845	high
TCGA-24-1105	3.95068	1	3.80578	4.58868	1.68485	6.47519	6.73894	0.597529	low
TCGA-24-1418	0.665753	0	3.24934	4.68555	3.27832	3.77652	7.11958	1.15654	high
TCGA-24-1419	0.654795	0	1.81926	3.45916	3.04757	1.64786	6.09854	1.05788	high
TCGA-24-1423	0.520548	0	2.61935	3.17887	2.26561	4.49105	6.99106	0.540157	low
TCGA-24-1425	0.49589	0	4.42302	5.93046	3.37572	4.18802	6.36719	2.00058	high
TCGA-24-1427	0.40274	0	3.94298	5.67162	3.24354	4.56027	5.58962	1.58263	high
TCGA-24-1428	1.44932	0	2.18464	5.87747	1.59521	4.75919	7.57492	0.713859	low
TCGA-24-1431	1.55342	1	2.20673	5.14792	2.15061	3.88206	6.88317	0.845773	low
TCGA-24-1467	8.83288	1	1.72444	3.74197	1.60734	4.36442	7.55662	0.441135	low
TCGA-24-1469	0.758904	0	1.89525	3.4971	4.48606	4.2259	7.72592	0.607038	low
TCGA-24-1470	0.287671	0	2.16883	4.54559	3.33712	5.9559	8.77734	0.443132	low
TCGA-24-1471	0.0986301	0	3.02554	3.35929	1.78184	3.62539	5.6667	0.805622	low
TCGA-24-1544	2.24658	1	2.56155	3.1782	2.0576	2.42768	4.48359	1.02037	high
TCGA-24-1553	4.8411	1	2.57063	5.58239	1.7847	7.52564	7.35992	0.396116	low
TCGA-24-1558	1.6274	1	3.43983	3.97896	2.37169	2.09967	3.7485	1.80974	high
TCGA-24-1560	3.67397	1	1.94287	3.67675	1.66717	3.2383	6.93677	0.636628	low
TCGA-24-1565	0.854795	1	2.81359	5.52342	1.66784	2.19159	6.9592	1.5347	high
TCGA-24-1604	7.36438	1	3.16687	3.85092	1.76242	3.30103	5.79702	0.993696	low
TCGA-24-1843	0.290411	0	2.37085	6.03585	2.14131	4.17259	6.92275	0.992109	low
TCGA-24-1844	0.309589	0	2.19585	4.45688	1.81548	1.82173	6.33531	1.19997	high
TCGA-24-1923	1.89041	1	3.67277	4.15058	3.01174	2.13569	6.6676	1.72625	high
TCGA-24-1924	2.51781	1	2.49899	6.35645	2.81835	6.05241	8.0143	0.695326	low
TCGA-24-1928	0.920548	1	3.31262	6.0343	2.74969	4.41597	4.95888	1.47977	high
TCGA-24-2026	2.90137	1	2.20572	5.18432	2.22811	5.54648	5.90721	0.616322	low
TCGA-24-2036	5.33425	1	1.81877	4.13348	1.61028	1.62254	5.08731	1.13356	high
TCGA-24-2038	3.70959	1	3.28227	4.22307	6.21541	1.88151	8.09749	2.12373	high
TCGA-24-2254	4.75616	1	2.81217	5.335	2.23136	2.01102	6.74787	1.65814	high
TCGA-24-2267	3.96164	1	2.84372	5.79171	1.60568	7.31617	5.28771	0.53282	low
TCGA-24-2271	2.63562	1	3.37792	4.22463	2.89448	5.51526	6.58747	0.712267	low
TCGA-24-2281	3.71781	0	2.62474	5.80095	1.63598	7.02257	6.79345	0.487028	low
TCGA-24-2288	0.0684932	1	4.0021	5.68768	3.141	6.32695	4.78506	1.10401	high
TCGA-24-2289	5.6137	1	4.05626	6.34624	5.21106	2.74494	6.30104	3.4135	high
TCGA-24-2293	1.3863	1	4.62009	6.05465	3.71873	3.98716	4.34487	2.71984	high
TCGA-24-2297	4.65479	1	1.89376	3.04114	2.89493	2.41738	6.37138	0.792155	low
TCGA-25-1313	2.24658	1	2.72952	6.10979	1.97437	2.89121	5.64724	1.6264	high
TCGA-25-1315	4.33699	1	2.7038	3.02046	1.69283	1.96798	7.1362	0.914462	low
TCGA-25-1318	2.91507	1	3.85998	5.34605	1.83436	3.71619	2.89241	1.84473	high
TCGA-25-1319	5.41644	1	2.36242	5.5098	2.0277	4.0755	7.81944	0.840447	low
TCGA-25-1320	3.16438	1	3.73443	5.05804	3.02041	3.37904	5.97159	1.65874	high
TCGA-25-1321	2.83014	1	2.25565	4.09155	1.73755	3.37221	7.06375	0.731881	low
TCGA-25-1329	1.25205	1	3.91661	5.95348	2.68208	2.60985	6.24981	2.40107	high
TCGA-25-1623	1.54795	1	4.73673	6.02959	3.79414	6.13308	3.06448	1.83729	high
TCGA-25-1631	0.0246575	1	2.41867	5.76204	3.58087	2.58673	7.08182	1.59904	high
TCGA-25-1633	5.18082	1	3.89832	5.64957	3.07819	5.84845	5.05111	1.16474	high
TCGA-25-1635	4.33699	1	3.83446	5.61716	4.9156	4.17553	5.50566	1.99933	high
TCGA-25-1870	1.24658	1	2.19134	4.62469	1.71668	2.24471	7.27906	1.03861	high
TCGA-25-1877	2	1	2.60591	4.45487	1.6825	5.63865	5.22004	0.570413	low
TCGA-25-2396	0.252055	1	2.35145	4.90386	2.33944	4.59999	7.2766	0.69713	low
TCGA-25-2399	1.66575	1	3.16369	6.08444	3.07428	4.6272	7.40689	1.18856	high
TCGA-25-2400	3.50137	1	2.26755	4.59683	4.21231	3.44339	2.99306	1.38984	high
TCGA-25-2404	2.41918	1	3.72938	5.38144	2.37439	4.83936	6.52226	1.12157	high
TCGA-29-1688	6.57534	1	3.04814	6.39248	2.7846	4.54147	5.33395	1.40926	high
TCGA-29-1691	4.0274	1	2.28014	5.26232	3.62855	4.43305	6.24391	0.946379	low
TCGA-29-1693	8.48219	0	3.16859	4.7694	2.66135	3.40005	7.40152	1.15844	high
TCGA-29-1694	3.25205	1	4.42161	4.63094	2.08489	3.4708	6.05362	1.60919	high
TCGA-29-1695	3.36712	1	3.74935	5.87543	4.44713	4.6102	5.22557	1.80438	high
TCGA-29-1697	2.6	1	1.86128	3.74798	3.49389	2.32999	8.43453	0.858192	low
TCGA-29-1701	1.41096	1	3.51346	5.793	4.98681	4.85887	7.96386	1.36674	high
TCGA-29-1711	2.88493	0	2.42586	5.09378	2.21571	6.37833	9.89833	0.395951	low
TCGA-29-1761	1.44658	1	3.94942	5.34281	5.06685	5.73301	2.6012	1.66755	high
TCGA-29-1763	5.56712	0	1.9565	5.62392	1.70658	3.42548	7.65344	0.882021	low
TCGA-29-1770	2.03014	0	3.71908	4.92506	2.73476	2.38253	3.81768	2.30584	high
TCGA-29-1777	1.02466	0	3.64414	4.91098	5.18111	5.06693	6.03591	1.30583	high
TCGA-29-1778	1.24384	0	2.04112	4.23831	1.60305	5.42295	5.95564	0.463325	low
TCGA-29-1781	0.69863	0	2.9134	6.13116	2.03417	7.82311	6.51261	0.495687	low
TCGA-29-1783	0.60274	0	3.20077	5.80429	3.03298	5.97338	4.84474	0.975636	low
TCGA-29-2414	7.18082	1	2.44235	3.43425	2.12454	4.89757	7.72473	0.461029	low
TCGA-29-2427	5.20548	0	2.91964	6.23883	2.46494	6.55249	7.06192	0.694547	low
TCGA-29-2428	3.7589	0	2.25011	4.84357	2.07824	7.41697	3.31998	0.436812	low
TCGA-29-A5NZ	2.98082	1	3.49805	3.96403	2.15271	4.02099	6.00841	0.96136	low
TCGA-30-1714	3.1726	1	2.25731	3.49638	4.56159	2.15527	7.43133	1.13505	high
TCGA-30-1857	0.0219178	1	3.93497	4.48802	3.40287	5.612	7.14708	0.868494	low
TCGA-30-1892	4.06575	1	3.61912	5.07916	3.87242	3.49096	3.48033	2.04969	high
TCGA-31-1944	3.79726	0	3.62086	4.87893	2.70507	4.33119	8.22533	1.01571	high
TCGA-31-1946	2.51507	0	3.3975	5.68944	2.99928	4.36749	6.73748	1.2895	high
TCGA-31-1950	1.56438	0	1.9472	5.06301	1.84362	5.05142	5.39744	0.627878	low
TCGA-31-1951	1.87397	0	3.44008	5.76327	3.87289	5.92771	7.05054	0.975983	low
TCGA-36-1568	2.39726	0	2.97403	4.67294	1.60681	4.8035	8.99206	0.614031	low
TCGA-36-1570	1.79452	0	1.8951	3.71335	1.65459	3.26629	4.16134	0.764031	low
TCGA-36-1571	1.90411	1	2.85527	3.78968	1.76694	2.38528	6.35749	1.08053	high
TCGA-36-1574	1.87945	0	3.47987	5.09653	2.57375	5.11851	7.52632	0.877464	low
TCGA-36-1577	2.14521	0	2.32044	4.01762	1.60547	1.59392	3.70425	1.40651	high
TCGA-36-1581	2.05753	0	2.42709	4.4949	1.65875	7.8155	3.19507	0.373211	low
TCGA-57-1582	2.00274	1	2.72019	4.62877	5.74057	5.01365	7.49401	0.927302	low
TCGA-57-1584	1.76164	0	1.95357	4.35983	2.21915	2.66827	6.07607	0.95378	low
TCGA-57-1586	1.86027	0	2.50356	3.2958	1.73297	4.41822	3.98236	0.638284	low
TCGA-57-1994	2.08493	0	1.84219	4.7347	1.69651	7.19085	6.3703	0.312485	low
TCGA-59-2348	15.0164	0	3.24063	5.0511	3.04092	4.37985	2.17054	1.4909	high
TCGA-59-2350	1.86027	1	2.63737	4.3772	2.08401	3.88206	8.65371	0.707498	low
TCGA-59-2351	9.67671	0	2.66697	5.23005	1.83632	6.53498	7.76603	0.468002	low
TCGA-59-2352	0.783562	1	3.37745	4.67231	1.7014	5.38438	4.10039	0.849484	low
TCGA-59-2354	2.86575	1	3.82545	5.75209	3.43642	6.18427	7.0229	0.972666	low
TCGA-59-2355	0.178082	1	3.3661	5.27385	6.35917	5.1825	6.91919	1.35305	high
TCGA-59-2363	0.452055	0	1.8753	3.77233	4.23805	2.57905	6.08762	1.04079	high
TCGA-59-A5PD	1.70959	1	2.89084	2.91556	1.60053	4.926	5.55756	0.510795	low
TCGA-61-1721	0.926027	0	3.98351	5.81667	2.52716	2.53021	2.70687	3.05789	high
TCGA-61-1725	2.61918	0	3.26294	5.2876	2.76935	4.96489	6.79502	0.960853	low
TCGA-61-1728	2.32329	0	2.35962	4.53935	1.95753	3.32594	6.13934	0.914682	low
TCGA-61-1733	2.64932	0	3.46318	4.87487	2.1154	3.33412	6.93508	1.27233	high
TCGA-61-1907	2.60822	0	1.88035	5.37058	6.73939	5.95945	6.85799	0.799322	low
TCGA-61-1911	3.54247	0	2.39406	4.3052	1.70768	7.08379	5.12324	0.371778	low
TCGA-61-1995	0.167123	0	1.94367	5.69959	1.72346	5.21081	6.28095	0.641179	low
TCGA-61-1998	0.460274	0	3.71229	5.84257	6.64953	3.89472	6.99294	2.34665	high
TCGA-61-2000	1.20822	0	2.62604	5.40104	2.35712	3.28258	8.35574	1.06468	high
TCGA-61-2002	1.49863	0	3.74572	5.81734	3.75513	6.49584	7.93871	0.867989	low
TCGA-61-2009	3.32055	0	3.77523	5.99586	2.8479	6.09073	4.92179	1.12648	high
TCGA-61-2088	0.39726	0	1.67006	3.41872	2.27043	1.94682	8.10762	0.749387	low
TCGA-61-2092	4.30959	0	1.61809	2.8655	2.1438	1.85109	2.65642	0.97424	low
TCGA-61-2097	5.05205	0	3.71369	5.21408	2.91471	2.80247	5.67597	1.97816	high
TCGA-61-2098	5.46027	0	2.19453	3.13739	1.60163	2.07811	5.4527	0.886454	low
TCGA-61-2102	0.539726	1	4.05318	6.56795	5.96597	1.76876	3.12201	6.12814	high
TCGA-61-2104	6.40548	0	1.92133	4.08975	1.70079	5.31352	6.02434	0.44858	low
TCGA-61-2110	3.70959	1	3.34344	4.65558	4.63657	1.99988	7.4594	2.03767	high
TCGA-61-2113	1.85205	1	3.85285	5.4938	3.37323	4.9656	5.90059	1.33762	high
TCGA-OY-A56Q	1.57808	0	2.19905	2.46042	1.63553	1.64675	5.40007	0.859014	low
GSM657529	7.48	0	1.56566	3.08944	3.7008	3.35061	7.04427	0.606958	low
GSM657534	2.51	1	2.55381	5.08164	4.04407	3.98415	6.83826	1.09521	high
GSM657536	2.45	1	3.17575	5.32078	2.723	3.42532	4.71045	1.57833	high
GSM657537	3.58	0	2.51246	6.38486	1.96544	6.22119	9.52721	0.55383	low
GSM657542	2.3	1	4.00717	4.81495	1.99535	3.95104	5.47066	1.37451	high
GSM657547	1.03	1	2.3901	4.7318	2.81942	3.231	5.81576	1.10134	high
GSM657549	0.17	1	2.66976	6.17894	2.93276	4.58159	2.98537	1.44242	high
GSM657554	6.29	1	3.14488	3.21328	3.00437	4.76527	8.78412	0.559748	low
GSM657556	3.83	1	2.04684	4.63616	2.43954	3.60432	3.6571	1.0051	low
GSM657557	2.71	0	2.75645	4.57684	3.42473	3.5296	7.44143	1.04131	high
GSM657558	2.84	1	3.15577	6.03595	4.06079	4.20913	4.51015	1.76689	high
GSM657559	6.3	1	3.30962	4.15513	2.39383	4.16322	5.64883	0.967014	low
GSM657563	2.48	0	3.03821	3.88103	2.30716	2.87765	4.56392	1.23544	high
GSM657568	1.28	1	3.2304	5.28945	5.10556	2.65225	4.96936	2.41967	high
GSM657569	2.16	0	1.89052	4.31928	1.58105	2.36673	6.56882	0.902624	low
GSM657570	2.83	1	4.42494	5.78347	6.99365	2.99128	4.92961	4.19402	high
GSM657572	2.06	0	3.96362	5.17604	4.43103	5.67713	6.18524	1.18946	high
GSM657573	1.59	1	4.05037	4.27539	3.36581	3.97311	4.50425	1.52569	high
GSM657575	0.56	1	3.3028	4.31438	2.13866	3.90146	7.30092	0.921375	low
GSM657577	2.96	1	3.49859	4.79303	4.69683	4.16768	4.72568	1.58432	high
GSM657581	3.18	1	2.96944	3.31596	4.652	3.46932	7.1815	0.992682	low
GSM657582	8.8	1	2.33207	6.4335	1.06364	3.84671	7.1188	1.01728	high
GSM657584	6.75	1	2.51655	3.78234	1.5035	2.45524	6.6589	0.921166	low
GSM657585	0.86	1	5.37733	4.64647	3.06453	5.43183	3.52117	1.73054	high
GSM657587	3.64	1	3.15699	4.51267	4.63041	6.66571	4.41359	0.756484	low
GSM657591	0.59	1	2.8775	5.6694	1.97523	5.65934	7.39991	0.699584	low
GSM657596	3.95	1	3.78853	6.07798	1.7346	1.91021	2.99137	3.20907	high
GSM657599	3.5	1	1.67383	3.54769	1.85059	2.21504	3.96608	0.925998	low
GSM657600	8.64	1	2.28978	7.03711	4.91221	7.35132	7.20884	0.732678	low
GSM657602	2.2	1	3.9715	4.14178	1.91866	2.93073	8.77566	1.18528	high
GSM657603	1.72	1	3.44125	4.679	3.87421	3.72503	5.33371	1.48792	high
GSM657604	0.98	1	3.47417	5.56446	2.9562	4.25146	5.54386	1.42779	high
GSM657607	0.33	1	2.59515	3.83532	2.2852	3.05277	6.96282	0.87594	low
GSM657608	1.3	1	1.7721	5.32247	5.77586	3.41065	8.37892	1.15202	high
GSM657611	2.52	1	4.3527	5.61153	2.42937	5.82817	7.70572	1.01748	high
GSM657612	4.53	1	3.10263	5.05543	2.86393	2.79645	7.1505	1.45407	high
GSM657613	0.92	1	3.08717	5.25752	1.74918	3.89356	8.50572	0.937801	low
GSM657614	2.4	1	2.59596	4.29979	3.26939	2.59491	7.18965	1.17878	high
GSM657616	2.32	1	2.58838	4.27662	2.24706	3.9913	6.9673	0.762667	low
GSM657617	3.5	1	2.37245	3.19931	1.75755	2.45078	5.17025	0.893696	low
GSM657622	1.55	1	3.18205	5.50423	4.11508	5.75123	4.19325	1.12746	high
GSM657628	0.35	1	2.78915	4.68552	1.95946	4.14111	7.8429	0.77293	low
GSM657629	2.89	1	2.27601	3.85935	1.40338	2.28396	8.43483	0.797956	low
GSM657630	7.85	1	2.34776	4.03332	1.59618	2.65589	7.25452	0.856196	low
GSM657632	3.55	1	4.1422	4.07794	3.7824	6.29882	4.25139	0.911168	low
GSM657638	3.95	1	2.92953	3.79643	2.54939	4.12511	4.46155	0.901351	low
GSM657641	0.82	1	2.30087	4.74156	3.03979	3.62773	6.29129	0.96895	low
GSM657643	1.48	1	3.00061	3.79643	2.07898	2.78159	5.5155	1.12211	high
GSM657647	1.34	1	3.49451	4.50372	3.34778	3.42383	4.07779	1.61648	high
GSM657648	9.02	1	2.02809	4.36621	2.29102	5.67137	7.96943	0.41685	low
GSM657654	13.5	0	2.10254	4.32629	0.547473	3.3904	7.93214	0.60961	low
GSM657658	1.98	1	2.79069	5.72751	3.30286	3.53803	8.0818	1.26401	high
GSM657660	0.82	1	2.68355	3.86433	2.1886	4.2775	5.44349	0.740586	low
GSM657661	3.19	1	2.46308	4.62383	2.4917	1.85841	8.60194	1.21296	high
GSM657664	0.4	1	1.98768	5.90395	3.62307	5.86906	5.87407	0.727078	low
GSM657669	2.33	1	3.71506	4.79379	2.20903	5.00152	5.33305	1.01341	high
GSM657670	10.87	1	1.70611	5.88305	2.55136	9.44282	5.93978	0.252034	low
GSM657671	8.46	1	1.91728	4.19285	2.66566	3.67106	5.94133	0.757542	low
GSM657674	1.37	1	2.71964	6.74691	2.75816	3.32818	6.48771	1.71113	high
GSM657675	6.81	1	2.00986	2.90495	1.44475	3.2906	6.98185	0.529097	low
GSM657676	1.84	1	3.42277	4.2823	1.97395	3.31929	3.79408	1.36901	high
GSM657677	1.66	1	2.29562	5.82715	1.31246	1.95984	8.8034	1.27165	high
GSM657678	0.88	1	4.02804	6.89109	4.81398	4.3168	3.73046	2.99407	high
GSM657679	0.8	1	3.56392	7.25414	3.70141	6.96453	6.23793	1.12263	high
GSM657680	2.03	1	2.66542	3.71602	1.4157	2.93644	6.74577	0.829436	low
GSM657683	2.25	1	3.31884	4.16478	2.16109	2.63067	7.16662	1.23199	high
GSM657684	0.56	1	3.17079	4.86642	1.22683	1.80413	4.39378	1.84712	high
GSM657688	6.49	1	2.70842	3.05353	1.7845	4.73602	7.36805	0.470199	low
GSM657693	5.4	1	2.9199	3.26776	2.7496	2.59312	5.91106	1.07154	high
GSM657694	2.54	1	5.6153	5.34624	3.06934	3.83938	4.06736	3.02666	high
GSM657695	4.67	1	1.99718	2.91098	2.15937	3.09328	5.39649	0.667568	low
GSM657696	5.27	0	3.16332	5.28768	5.51009	4.98483	9.3335	1.03876	high
GSM657697	0.52	1	3.40055	4.93031	2.57611	3.95042	5.56659	1.26136	high
GSM657699	0.71	1	2.92477	3.21688	3.87918	2.12894	2.53613	1.69629	high
GSM657700	3.94	1	2.54851	4.36165	1.81885	3.6716	3.82032	0.990131	low
GSM657703	4.46	0	2.11715	3.16701	2.1886	3.00248	6.49104	0.691217	low
GSM657704	1.81	1	2.1409	4.26956	2.04382	3.15185	7.19512	0.794991	low
GSM657707	0.74	1	3.52716	4.9472	3.76855	4.68216	4.35182	1.35702	high
GSM657708	4.96	0	2.75301	4.67674	2.14944	5.35717	6.19196	0.653278	low
GSM657711	4.66	0	3.5346	7.90307	4.05488	4.71166	8.00424	2.01574	high
GSM657713	3.73	1	2.83874	5.25558	2.29415	3.96883	6.62036	1.04086	high
TCGA-04-1332	3.41644	1	3.71562	4.79258	1.9081	2.58775	5.89849	1.6872	high
TCGA-04-1338	3.88493	0	4.26917	6.05704	3.65359	7.2951	6.6003	0.944492	low
TCGA-04-1341	0.090411	0	2.34334	3.67314	2.24505	3.04239	7.75457	0.746037	low
TCGA-04-1343	0.989041	1	3.18601	4.89427	3.05183	3.03926	3.96065	1.73159	high
TCGA-04-1347	5.25753	0	2.36643	3.08565	1.82743	2.66151	5.51785	0.813759	low
TCGA-04-1356	4.10685	1	2.7886	3.64291	1.86419	2.83339	7.37258	0.868361	low
TCGA-04-1364	2.80548	1	2.61107	1.98931	1.79631	1.7948	5.50453	0.846965	low
TCGA-04-1365	6.38082	0	2.23945	4.78373	2.30076	5.32095	7.25311	0.552741	low
TCGA-04-1514	4.71233	1	2.14867	2.67527	1.85545	2.60354	4.61185	0.762062	low
TCGA-04-1530	9.92329	1	3.73129	4.9643	2.44763	6.67619	6.78589	0.65264	low
TCGA-04-1536	2.42466	1	4.28903	4.7986	3.1368	2.83509	3.53703	2.50115	high
TCGA-04-1542	7.01644	1	1.7225	2.57425	1.68324	1.67303	6.04719	0.737612	low
TCGA-04-1648	2.3863	1	1.62627	4.29525	4.09044	4.00818	9.50109	0.596223	low
TCGA-04-1655	3.78082	1	2.46182	2.89759	1.69077	1.55784	5.37504	1.04229	high
TCGA-09-0366	4.8137	1	2.42958	7.79923	3.70332	2.9687	5.60452	2.53543	high
TCGA-09-0367	1.49863	1	3.18601	4.4566	2.17432	4.20303	4.60544	1.03847	high
TCGA-09-0369	2.96438	1	2.26755	5.34368	2.25408	2.1057	4.77053	1.61352	high
TCGA-09-1665	3.46849	1	2.34303	3.91406	1.65	4.57269	7.13211	0.53296	low
TCGA-09-1666	4.8	0	2.57865	4.63724	2.68097	6.20905	7.27215	0.493155	low
TCGA-09-1667	5.15616	0	3.0174	5.62844	2.04956	6.37335	8.2527	0.575675	low
TCGA-09-1670	1.49863	0	2.24359	5.17144	2.46611	3.34584	8.07173	0.928791	low
TCGA-09-1673	0.252055	0	2.1049	4.98884	1.74356	2.2583	7.17697	1.10353	high
TCGA-09-2051	5.25753	0	3.04192	5.15476	3.76355	2.9492	5.45856	1.74418	high
TCGA-09-2054	1.74521	1	2.48544	5.4484	4.68599	3.74487	4.51751	1.55151	high
TCGA-10-0927	6.82192	1	2.6287	3.24898	1.68008	2.10559	7.85492	0.863761	low
TCGA-10-0928	1.54247	1	2.33006	2.68558	1.72881	1.79604	7.50298	0.78435	low
TCGA-10-0931	2.73973	1	2.15608	3.86188	1.72594	2.69313	7.63459	0.766498	low
TCGA-10-0933	1.22192	1	2.0895	2.71088	2.98383	2.09222	3.96612	1.00739	high
TCGA-10-0936	3.07671	1	2.38247	3.32643	1.59659	3.58777	4.03764	0.745549	low
TCGA-10-0937	1.66575	1	2.70565	5.08663	2.38386	3.247	4.76981	1.32547	high
TCGA-10-0938	1.74247	1	2.08451	1.65517	1.62476	1.78223	6.20627	0.640911	low
TCGA-13-0714	0.517808	1	3.26896	4.86964	2.76857	3.71334	6.57341	1.20913	high
TCGA-13-0726	2.6	1	2.93606	3.84214	2.11271	3.29682	7.86698	0.836104	low
TCGA-13-0730	1.48493	1	4.66816	4.97754	5.63009	2.3014	4.98977	3.84504	high
TCGA-13-0762	9.31507	0	2.23924	2.56968	1.7908	1.93419	3.7485	0.947212	low
TCGA-13-0765	3.80548	1	4.83641	4.55949	5.82354	2.28465	3.34791	4.23722	high
TCGA-13-0766	4.72603	1	2.88276	4.76774	4.26528	3.36743	5.5002	1.46219	high
TCGA-13-0795	1.69589	1	2.28866	5.53737	6.1496	4.14053	3.80045	1.67215	high
TCGA-13-0800	7.29041	0	2.29747	2.15551	1.59521	1.55542	4.10598	0.922205	low
TCGA-13-0804	2.93973	1	1.98997	6.16297	2.05547	3.53153	8.16513	0.973613	low
TCGA-13-0883	5.74521	1	4.32739	5.71588	2.84533	4.57928	5.98871	1.64603	high
TCGA-13-0885	9.28219	0	2.37165	4.68232	2.23497	7.18682	7.45378	0.350289	low
TCGA-13-0887	5.55616	1	2.97053	5.01228	3.14376	2.0642	7.11532	1.71193	high
TCGA-13-0905	10.263	0	3.71133	2.83538	4.50678	3.2012	6.68321	1.19332	high
TCGA-13-0908	5.04932	1	3.68824	5.48356	2.99288	4.54117	4.57237	1.49145	high
TCGA-13-0911	3.71233	1	4.13188	5.69656	5.13622	3.09457	6.97135	2.64024	high
TCGA-13-0924	7.16164	0	3.30878	5.98612	3.77036	6.05993	6.29607	0.997883	low
TCGA-13-1404	6.76438	0	3.16369	4.31809	2.68499	4.16894	6.13397	0.957426	low
TCGA-13-1408	4.60274	1	3.97257	4.26082	3.76475	5.40425	3.8781	1.14987	high
TCGA-13-1410	6.75068	0	3.33054	4.7022	3.50468	4.56827	7.09557	1.00591	high
TCGA-13-1477	4.55342	1	2.36524	3.45802	1.63989	3.68884	5.58725	0.670718	low
TCGA-13-1483	2.45205	1	3.27238	4.56616	2.83091	3.18112	6.78736	1.27894	high
TCGA-13-1485	1.72329	1	4.37927	4.31471	2.92468	2.37271	4.00186	2.44663	high
TCGA-13-1492	10.463	1	1.8	3.98825	4.48179	2.08216	7.02488	1.15566	high
TCGA-13-1497	10.6055	0	2.70444	4.38399	6.02033	4.45437	4.42448	1.28258	high
TCGA-13-1499	9.58904	0	3.95287	4.64135	3.46978	6.41074	6.77821	0.768832	low
TCGA-13-1501	3.6	1	3.40788	3.7548	3.64681	3.3076	7.73308	1.1044	high
TCGA-13-1506	2.84658	1	2.86849	3.85896	1.92882	2.87104	7.58096	0.913515	low
TCGA-13-1510	3.72329	1	3.00726	3.02949	2.00749	4.37367	5.75288	0.635246	low
TCGA-13-2060	6.49041	0	2.76487	5.135	2.08963	7.12902	6.53453	0.457302	low
TCGA-13-A5FT	5.87123	0	2.2365	2.65425	4.00445	2.87377	6.80599	0.782203	low
TCGA-20-0987	1.92055	1	2.57118	7.06826	1.69297	5.51227	6.45102	0.931718	low
TCGA-20-1683	2.11507	0	3.77017	3.57824	2.94105	4.14205	3.02724	1.24205	high
TCGA-20-1686	0.243836	0	1.88362	3.45028	2.71616	2.75296	2.25713	1.04251	high
TCGA-23-1021	3.96164	1	2.7178	4.0658	1.70075	1.75082	8.75127	1.07874	high
TCGA-23-1022	4.13973	1	2.39925	3.67151	4.79625	2.73288	3.71519	1.41927	high
TCGA-23-1024	1.28219	0	2.60367	2.25769	1.66974	2.83887	8.99206	0.536958	low
TCGA-23-1027	2.67397	1	3.38981	5.169	2.3436	2.53749	6.64306	1.68193	high
TCGA-23-1109	4.27945	1	2.38219	4.35022	2.21753	3.29948	4.97536	0.992646	low
TCGA-23-1111	0.268493	0	2.48841	3.33414	1.91082	1.90081	7.64418	0.924952	low
TCGA-23-1114	5.72329	1	3.22915	3.31301	1.81292	1.57753	7.63142	1.20615	high
TCGA-23-1116	1.62192	1	4.38182	5.5276	5.08644	3.89882	4.95847	2.57515	high
TCGA-23-1119	10.8301	0	2.22961	5.83229	2.31679	5.89688	7.67356	0.583097	low
TCGA-23-1120	0.356164	0	2.64283	5.01834	1.69018	5.55985	7.78874	0.552694	low
TCGA-23-1122	3.25753	1	2.16706	4.29991	2.18784	3.33297	6.80278	0.805217	low
TCGA-23-1809	0.0438356	0	2.94149	3.3337	2.17749	3.08311	7.89568	0.795094	low
TCGA-23-2078	7.29041	0	3.2586	4.865	2.74818	5.94075	6.01463	0.731109	low
TCGA-23-2084	4.15342	1	3.58996	5.67881	1.83543	2.93799	4.98138	1.91528	high
TCGA-24-0966	0.635616	0	1.79284	4.37405	1.66653	2.89795	7.29338	0.750191	low
TCGA-24-0968	1.63836	1	3.40459	6.3452	3.46911	4.60932	5.22186	1.63832	high
TCGA-24-0970	0.969863	1	3.80578	4.75918	3.35928	1.96637	5.91974	2.32011	high
TCGA-24-0979	3.46301	1	2.51742	3.52059	1.76697	3.24383	3.78646	0.907423	low
TCGA-24-0982	1.86027	1	2.68901	3.51248	1.73592	3.3325	6.23628	0.779131	low
TCGA-24-1413	0.526027	0	2.09086	4.74557	4.69188	2.74299	8.70243	1.13814	high
TCGA-24-1416	0.531507	0	2.41391	4.32088	1.71675	2.44683	6.3021	1.05556	high
TCGA-24-1417	0.652055	0	3.75906	6.21228	2.91369	4.60748	6.90355	1.46986	high
TCGA-24-1422	0.0630137	1	3.79921	5.75586	3.35883	3.64906	4.4106	2.12266	high
TCGA-24-1424	0.50137	0	2.84667	5.35119	4.03986	4.04713	5.8508	1.32565	high
TCGA-24-1426	0.446575	0	2.79674	4.96836	2.13267	1.7775	4.52827	1.87001	high
TCGA-24-1430	2.36438	1	2.17884	3.40733	1.92785	1.854	6.88664	0.922953	low
TCGA-24-1434	1.55616	1	4.36122	6.41929	3.64591	5.65148	4.18651	1.84086	high
TCGA-24-1435	3.6274	1	3.89256	4.94148	2.56284	5.18086	8.0379	0.901533	low
TCGA-24-1464	1.03836	1	2.08287	4.80345	1.83253	3.87361	7.26726	0.716793	low
TCGA-24-1474	1.85205	1	1.92211	6.14655	1.6839	3.13025	3.92463	1.36047	high
TCGA-24-1546	5.35616	1	3.94823	4.89712	3.60023	3.59706	6.54205	1.64605	high
TCGA-24-1549	4.71507	1	1.95783	3.46527	1.94388	4.69835	7.57786	0.423082	low
TCGA-24-1550	3.42192	1	3.92571	6.3659	4.5739	5.43239	4.88424	1.78926	high
TCGA-24-1551	4.32603	1	2.34069	6.03118	2.35685	5.35527	5.96318	0.809267	low
TCGA-24-1552	3.44932	1	2.41725	4.83984	1.83145	3.30465	4.44332	1.10715	high
TCGA-24-1557	3.32329	1	2.00402	5.16066	1.64612	4.39071	5.70437	0.731614	low
TCGA-24-1562	3.79178	1	3.14888	4.53846	4.98229	3.76848	7.06987	1.31242	high
TCGA-24-1563	3.97534	1	3.95213	5.28493	3.32149	3.38882	7.12791	1.753	high
TCGA-24-1567	1.43562	1	2.2169	3.49124	4.35787	1.88562	4.49534	1.44067	high
TCGA-24-1603	7.51233	1	2.80107	4.56864	2.04047	3.48985	8.00046	0.882623	low
TCGA-24-1616	3.1863	1	2.93305	4.11964	1.65446	3.17979	6.81227	0.935586	low
TCGA-24-1842	0.693151	0	3.54204	4.76906	2.96625	5.79249	5.85358	0.829916	low
TCGA-24-1845	0.317808	0	2.08985	4.9569	3.99873	4.24291	2.76954	1.17121	high
TCGA-24-1846	0.364384	0	3.58945	4.53567	2.44043	4.66533	7.43133	0.888438	low
TCGA-24-1847	0.939726	0	3.25098	5.28715	3.78905	7.60274	5.87234	0.602799	low
TCGA-24-1850	0.460274	0	3.86827	6.11915	3.65839	5.48577	3.52223	1.64944	high
TCGA-24-1930	6.7589	1	3.36956	6.2361	2.35042	6.42404	3.49831	1.02784	high
TCGA-24-2020	12.6685	1	2.64943	4.13482	4.22359	3.06622	2.65091	1.56996	high
TCGA-24-2023	3.73699	1	3.04877	5.58123	4.68297	4.35192	6.91037	1.35717	high
TCGA-24-2024	4.84658	1	2.91944	5.01077	2.15419	3.42315	8.4072	1.00067	low
TCGA-24-2027	9.14247	1	2.3901	2.8434	4.00391	3.4756	4.85313	0.842834	low
TCGA-24-2033	1.53973	1	2.967	5.66053	3.1053	3.70105	7.19224	1.31082	high
TCGA-24-2035	2.34795	1	4.5301	7.04386	6.20186	5.57852	8.92237	2.0999	high
TCGA-24-2261	0.0657534	1	3.21228	6.27492	2.42302	6.79849	7.36225	0.696227	low
TCGA-24-2262	0.030137	1	2.91382	4.39033	2.5263	5.2805	2.83113	0.862687	low
TCGA-24-2280	5.87123	0	3.87849	5.78082	3.89702	2.32196	5.47145	2.94801	high
TCGA-24-2290	3.01918	1	2.72133	5.95783	1.94084	3.15153	7.23941	1.31434	high
TCGA-24-2298	4.43836	1	3.78078	4.32003	2.93139	2.59961	2.12551	2.25108	high
TCGA-25-1312	0.0849315	1	2.86617	4.82457	4.20422	2.85633	4.9951	1.71567	high
TCGA-25-1316	3.50411	1	2.08691	3.708	4.44937	5.51727	4.46956	0.614141	low
TCGA-25-1317	0.167123	1	3.1377	4.23051	2.65993	3.57643	5.19753	1.14675	high
TCGA-25-1322	0.249315	1	3.2038	6.53071	4.06983	2.37024	6.83183	2.63168	high
TCGA-25-1323	1.08219	1	2.81341	5.06845	4.36561	1.96863	4.60509	2.30625	high
TCGA-25-1326	3.42192	1	3.57159	6.33503	4.35177	6.45166	6.66205	1.0883	high
TCGA-25-1328	5.50411	1	4.3465	4.95836	1.86816	3.41309	7.65983	1.49583	high
TCGA-25-1626	1.41918	1	4.64541	6.37328	4.43015	4.02486	4.79649	3.032	high
TCGA-25-1627	1.07945	1	2.72133	4.37748	1.6938	2.89881	6.61471	1.01652	high
TCGA-25-1628	1.71781	1	3.35394	5.68116	2.8695	6.60136	4.92065	0.832751	low
TCGA-25-1630	3.18356	1	2.83243	6.14214	1.84053	3.14643	7.06375	1.41307	high
TCGA-25-1632	4.92877	1	1.79689	3.80197	1.79891	1.82167	8.76937	0.787598	low
TCGA-25-1634	2.98904	1	2.09183	2.25583	1.59521	1.82648	7.06006	0.677595	low
TCGA-25-2042	1.08493	1	5.21029	5.99355	4.1963	3.18024	3.69455	4.21517	high
TCGA-25-2391	4.08767	1	2.59724	5.15476	2.97986	2.55419	5.81919	1.5257	high
TCGA-25-2392	0.0849315	1	2.31719	7.43792	1.7965	3.877	4.21358	1.65093	high
TCGA-25-2393	3.16986	1	3.01166	4.92863	1.62666	4.29197	7.99138	0.796711	low
TCGA-25-2398	3.75068	1	4.4373	5.21576	2.89429	4.27345	5.5867	1.69751	high
TCGA-25-2401	0.246575	1	4.12807	6.70306	2.61979	5.32937	7.88744	1.37108	high
TCGA-25-2409	2.24932	1	3.47467	6.27994	2.27332	4.5522	7.01332	1.2973	high
TCGA-29-1690	3.96712	1	4.49364	6.98721	1.59521	4.19835	8.32444	1.83872	high
TCGA-29-1696	2.8274	1	1.82438	3.45526	2.29512	3.9138	7.17028	0.525253	low
TCGA-29-1703	4.9726	1	2.40813	4.41096	2.26416	3.75496	7.79272	0.747601	low
TCGA-29-1705	1.52055	1	3.72527	5.17434	2.81657	3.94101	5.73906	1.47378	high
TCGA-29-1707	3.49863	0	1.99584	3.96684	1.64857	2.60944	6.99657	0.794364	low
TCGA-29-1710	2.60548	1	3.24043	5.35212	3.52667	6.35431	2.85911	0.990365	low
TCGA-29-1762	7.21644	1	1.9478	4.84916	1.77503	1.56976	7.31982	1.20346	high
TCGA-29-1766	3.28493	1	3.18233	4.61522	3.347	3.76397	7.2485	1.12012	high
TCGA-29-1768	2.60822	1	4.15863	5.10001	4.16989	5.33739	7.78501	1.16404	high
TCGA-29-1769	1.91507	0	3.12298	4.96836	2.46322	3.54737	7.35504	1.13186	high
TCGA-29-1774	1.44384	0	2.51944	3.69437	4.29382	1.62353	7.43931	1.40405	high
TCGA-29-1776	0.986301	0	2.8632	4.27159	2.4148	2.85046	8.33648	0.998691	low
TCGA-29-1784	0.446575	0	2.38126	5.58123	2.40428	6.97275	3.19815	0.615168	low
TCGA-29-1785	3.02466	1	2.41374	5.72389	2.13871	7.04643	9.08128	0.403614	low
TCGA-29-2425	5.41644	0	2.16261	3.7401	1.91338	5.28138	7.3005	0.418875	low
TCGA-30-1718	4.32603	1	3.62155	4.92719	3.21295	3.89808	6.46815	1.36042	high
TCGA-30-1853	3.02192	1	2.84003	2.48804	1.81941	1.73375	6.57205	0.94557	low
TCGA-30-1860	3.74247	1	3.05896	5.72631	2.57878	7.43331	4.7492	0.623372	low
TCGA-30-1861	2.89863	1	3.82067	3.83483	2.78855	3.29657	4.03874	1.49376	high
TCGA-30-1862	0.509589	1	3.20217	4.74955	2.85727	4.15107	5.13152	1.16392	high
TCGA-30-1866	3.05205	1	2.10876	4.18846	2.04932	4.89951	4.36828	0.620971	low
TCGA-30-1891	2.50411	1	4.83769	5.34012	3.62623	4.42932	5.45908	2.04029	high
TCGA-31-1953	0.558904	0	3.23488	5.95498	2.72406	6.45166	3.76613	0.946416	low
TCGA-31-1956	3.67671	0	3.99555	6.7549	3.12475	8.69352	7.20797	0.65792	low
TCGA-31-1959	0.183562	0	4.71419	5.67881	4.57967	3.86517	5.10955	2.75246	high
TCGA-36-1569	2.42466	0	3.58851	5.20552	3.19837	6.57135	6.90191	0.727522	low
TCGA-36-1576	2.50685	0	4.7181	6.51619	3.38609	6.83494	5.37504	1.39324	high
TCGA-36-1580	2.01918	1	4.05651	5.58066	3.04822	5.92158	6.91037	1.02943	high
TCGA-57-1583	0.947945	1	2.25152	3.41141	1.99717	2.55915	6.8815	0.801131	low
TCGA-57-1585	0.145205	1	4.05113	5.34463	3.53532	4.42989	5.02746	1.6834	high
TCGA-57-1993	2.09041	0	3.43467	5.57896	3.37975	2.67445	6.10721	2.08185	high
TCGA-5X-AA5U	0.989041	0	2.10755	2.40816	1.59613	1.79568	6.75232	0.723726	low
TCGA-61-1724	1.74521	1	3.20217	4.43478	2.04358	4.57928	4.43111	0.946857	low
TCGA-61-1736	4.06575	1	2.33953	4.659	1.72319	2.52196	4.61581	1.23021	high
TCGA-61-1737	3.73699	0	3.84272	5.75712	3.02127	4.22108	5.32852	1.6933	high
TCGA-61-1738	2.98356	1	2.40924	5.28939	6.35205	2.53816	2.18365	2.76086	high
TCGA-61-1741	2.80548	1	2.30153	4.20386	2.32163	5.85751	5.84238	0.483464	low
TCGA-61-1900	0.482192	0	2.05007	3.16627	4.11371	4.6163	3.52578	0.694565	low
TCGA-61-1910	3.08767	0	1.75789	3.96377	1.64059	2.79526	6.14927	0.754694	low
TCGA-61-1914	4.71781	0	2.49132	5.25658	2.75071	5.3174	7.98223	0.652458	low
TCGA-61-1918	1.31233	1	2.38732	5.21751	1.85256	4.37849	7.42592	0.746128	low
TCGA-61-1919	3.18082	1	3.96149	6.34315	4.21281	5.70815	7.72592	1.32556	high
TCGA-61-2003	0.334247	0	4.56991	5.80814	5.46794	4.28491	4.87047	2.74588	high
TCGA-61-2008	2.55342	0	3.05139	4.24574	1.6835	6.44444	4.94603	0.517193	low
TCGA-61-2012	2.55342	0	3.75714	5.70615	1.63558	6.51478	7.93871	0.67703	low
TCGA-61-2101	4.62466	1	3.32036	4.48623	2.87058	3.7697	9.18841	0.93724	low
TCGA-61-2109	1.72329	1	2.40884	4.4999	3.72686	2.1926	7.04442	1.36544	high
TCGA-61-2111	10.4795	0	3.13749	4.61216	5.5926	2.93047	1.63869	2.54365	high
TCGA-VG-A8LO	0.0657534	1	2.10555	3.16316	1.77328	2.34016	6.93156	0.749336	low
TCGA-WR-A838	0.832877	1	2.06825	2.28985	2.64817	1.55657	3.78379	1.0188	high
GSM657532	1.72	1	3.60948	5.83227	2.86921	3.30202	4.32554	2.12824	high
GSM657533	3.99	0	2.05459	4.79011	2.16882	9.44282	4.28629	0.237073	low
GSM657538	3.53	0	2.51966	4.87878	3.08628	3.22848	6.02275	1.1938	high
GSM657539	3.49	0	2.97068	3.95887	2.61289	5.53582	5.74406	0.617726	low
GSM657540	0.71	1	2.41702	3.0502	3.97174	2.389	5.08283	1.13025	high
GSM657548	3.55	1	2.87673	5.21686	2.29635	3.83817	8.12221	0.968462	low
GSM657550	1.47	1	2.48564	5.83745	2.23919	5.04174	5.06809	0.916558	low
GSM657551	6.86	0	2.20113	3.86633	1.65363	3.07958	3.92603	0.912172	low
GSM657552	2.37	1	2.63332	4.31232	4.09279	2.48462	6.11638	1.44244	high
GSM657553	3.7	0	4.14156	5.87153	4.11774	3.49989	5.61959	2.46215	high
GSM657565	2.16	1	3.13605	4.66679	3.4528	6.19545	4.68967	0.754037	low
GSM657566	2.27	0	3.217	3.6345	2.04861	3.92083	5.52667	0.870442	low
GSM657567	2.23	0	4.51555	6.37381	3.64337	6.87685	7.43956	1.12493	high
GSM657571	2.15	0	2.40313	6.87003	2.2959	3.33384	8.77566	1.30448	high
GSM657576	4.94	1	3.43667	4.28758	2.23066	4.1542	5.04684	1.05822	high
GSM657578	1.75	1	3.53638	5.39208	4.71823	4.04085	5.81155	1.74016	high
GSM657579	1.91	1	3.19816	4.10404	2.4477	2.78021	4.24924	1.43735	high
GSM657580	4.6	1	2.20659	4.11824	1.62387	3.22797	8.23341	0.684186	low
GSM657583	5.68	1	3.38219	6.08512	2.97868	6.27063	6.93129	0.869275	low
GSM657588	5.15	1	2.80728	6.11449	3.42313	7.70554	6.18524	0.584832	low
GSM657589	0.62	1	2.2723	3.7418	2.1404	3.80471	4.73044	0.756443	low
GSM657592	3.12	1	2.38938	3.9917	7.33905	4.76302	7.82471	0.909074	low
GSM657593	0.21	1	3.83478	5.62313	3.41668	5.2231	6.18402	1.2662	high
GSM657595	0.99	1	2.58006	4.29386	2.03638	2.73726	7.20097	0.993884	low
GSM657597	5.34	1	2.87673	4.596	3.34477	4.17519	5.23653	1.07123	high
GSM657598	6.83	1	3.60899	5.37654	3.34063	4.30595	7.91114	1.23779	high
GSM657601	1.94	1	2.48681	2.89483	1.98305	2.58452	6.19454	0.797184	low
GSM657605	7.88	1	2.85118	3.98091	1.89803	2.81737	4.66412	1.15733	high
GSM657606	3.93	1	2.75261	4.75186	2.59465	2.49181	8.18489	1.20527	high
GSM657609	9.22	1	3.36091	4.07204	2.87448	3.73169	6.51696	1.05775	high
GSM657610	3.75	1	2.31499	3.70251	2.72826	2.65317	3.597	1.1542	high
GSM657615	0.66	1	4.9972	4.45353	3.35193	5.25811	3.52082	1.60993	high
GSM657618	3.24	1	2.41587	3.71495	2.08592	4.95892	6.47789	0.5206	low
GSM657619	0.06	1	2.59101	3.59236	3.02537	2.42638	5.873	1.12809	high
GSM657621	2.99	1	2.74342	3.86107	3.96422	4.19437	8.06111	0.769398	low
GSM657623	4.83	1	2.32843	3.57422	2.65364	2.56567	4.84234	1.04623	high
GSM657624	4.12	1	2.72229	3.57111	2.65735	4.8744	4.53556	0.682191	low
GSM657625	1.56	1	3.46292	3.91805	1.70936	3.46061	9.10905	0.827694	low
GSM657626	3.99	1	2.20551	3.72961	2.10872	3.36434	5.72052	0.765703	low
GSM657627	0.31	1	3.47318	3.75425	4.02498	3.09283	5.34845	1.45744	high
GSM657631	4.39	0	3.2736	4.88748	2.34498	4.18278	5.26501	1.13826	high
GSM657633	6.51	1	2.84933	4.95426	3.86079	2.45387	6.09505	1.72629	high
GSM657635	2.74	1	2.41958	2.87306	2.28177	5.60855	7.16125	0.362508	low
GSM657636	1.47	1	1.7961	4.18607	2.23287	3.12866	6.48603	0.766864	low
GSM657637	0.97	1	5.60553	3.87536	5.29957	2.73906	3.56382	3.77282	high
GSM657639	3.97	1	3.35953	3.71434	2.71131	3.46261	3.34842	1.28505	high
GSM657640	1.69	1	3.88155	3.86054	2.84845	3.78603	4.29677	1.34116	high
GSM657644	10.04	0	2.79412	4.47735	3.26539	2.3593	5.36374	1.55458	high
GSM657645	0.59	1	2.92557	4.52444	4.05034	2.35418	6.41867	1.64302	high
GSM657646	3.68	1	2.17689	6.05905	1.61204	3.86816	5.96802	1.02955	high
GSM657649	1.1	1	5.49142	7.83682	7.16051	4.18891	4.74506	6.70075	high
GSM657650	2.57	1	2.05649	5.41495	2.38552	7.25467	7.89761	0.363925	low
GSM657651	1.97	1	2.59324	3.89598	1.84384	2.67917	9.26906	0.787229	low
GSM657653	13.46	0	2.61772	4.09565	1.01472	2.93024	8.55335	0.750111	low
GSM657655	2.62	1	2.42514	3.02242	1.92473	2.86155	4.73093	0.830271	low
GSM657656	3.74	1	2.53545	4.91666	1.90208	4.30866	7.39991	0.746302	low
GSM657657	2.53	1	2.61428	2.79564	3.81338	2.44505	6.37752	1.00052	low
GSM657662	5.9	1	2.03977	4.18607	2.33992	3.96408	5.13007	0.745643	low
GSM657663	4.88	1	3.46292	6.79004	3.42947	7.91189	7.23149	0.71366	low
GSM657665	7.22	1	3.28543	5.37072	2.07592	1.88252	4.57474	2.24752	high
GSM657666	5.41	1	1.89222	3.5061	2.26593	3.69751	8.60194	0.51348	low
GSM657667	10.73	0	2.42216	3.89779	1.86443	4.19165	8.64258	0.546965	low
GSM657668	7.43	1	2.23152	5.48489	1.95362	8.06727	8.30599	0.295706	low
GSM657681	2.18	1	2.84458	4.29013	2.69495	3.1006	4.94669	1.22859	high
GSM657682	8.82	1	2.39588	2.26056	1.7845	2.68811	6.55197	0.633008	low
GSM657685	6.88	1	2.29271	6.17461	4.29475	6.48462	6.57899	0.736807	low
GSM657686	5.63	1	2.65739	5.92597	2.07361	6.99624	5.18185	0.595783	low
GSM657689	6.54	1	2.65628	4.44256	1.28733	4.59779	7.8928	0.58878	low
GSM657690	0.79	1	3.64646	5.09987	3.63255	3.35203	4.36643	1.96448	high
GSM657692	4.55	1	2.9121	3.53371	2.61962	3.1401	4.61366	1.07199	high
GSM657702	7.97	0	2.39905	3.78868	2.28693	2.83946	4.50799	1.02938	high
GSM657706	1.12	1	2.88738	3.69078	4.55727	3.49563	6.95826	1.05065	high

## Sheet: training cohort
id	futime	fustat	GFPT2	VSIG4	HOXA5	CXCL9	LYPD1	riskScore	risk
TCGA-04-1331	3.66027	1	3.24134	3.63446	2.50904	3.4079	4.42032	1.12519	high
TCGA-04-1350	5.33151	1	1.80311	2.85147	3.11932	3.53706	8.37427	0.50396	low
TCGA-04-1361	2.70959	0	2.12932	3.38087	2.00083	3.46692	3.13928	0.805849	low
TCGA-04-1362	3.69315	1	1.9256	4.28056	4.34377	2.72314	4.35097	1.29766	high
TCGA-04-1519	0.0657534	0	1.77033	3.06375	1.62427	1.88592	8.20302	0.672458	low
TCGA-04-1651	3.01918	1	2.29747	3.91183	3.66765	3.43745	7.42065	0.838263	low
TCGA-09-0364	2.43014	1	2.9214	2.76979	3.99478	1.54096	5.40057	1.46866	high
TCGA-09-1659	0.832877	1	2.83222	5.29708	1.75117	2.28132	7.15134	1.43178	high
TCGA-09-1661	3.20274	1	2.14084	3.77036	4.05583	2.00972	6.0077	1.26537	high
TCGA-09-1662	7.44384	1	3.11021	5.47403	4.21078	3.92382	8.15439	1.3034	high
TCGA-09-1668	4.6137	0	3.15955	4.05006	2.67259	6.6439	8.07173	0.433563	low
TCGA-09-1669	2.54247	0	2.08426	4.62121	3.06556	6.47098	7.09356	0.425373	low
TCGA-09-2044	0.509589	0	2.36511	5.58453	2.04854	3.87044	7.2215	0.938518	low
TCGA-09-2045	2.92877	1	2.19321	4.25369	3.09917	2.44264	6.71716	1.10207	high
TCGA-09-2048	0.378082	1	2.42709	4.11467	3.96914	2.25267	5.52456	1.42306	high
TCGA-09-2053	3.31233	0	2.37962	4.81704	6.45688	6.06531	8.10262	0.705494	low
TCGA-09-2056	1.03836	0	2.65498	4.63094	1.63916	3.54397	7.40152	0.84836	low
TCGA-13-0720	3.71233	1	3.65313	3.00842	3.45911	3.20762	6.26436	1.12217	high
TCGA-13-0724	0.227397	1	3.10552	3.87271	5.82411	2.37702	6.85154	1.74699	high
TCGA-13-0725	1.03288	1	2.90164	5.29749	4.0273	3.13251	5.92922	1.64692	high
TCGA-13-0727	1.26575	1	2.76954	5.01605	6.49547	1.95498	4.69935	2.81133	high
TCGA-13-0768	4.88767	1	5.31123	5.98682	3.55339	7.42229	5.14474	1.31371	high
TCGA-13-0797	5.81096	0	1.91103	4.10626	3.37303	3.31504	6.36608	0.845844	low
TCGA-13-0884	8.93151	1	3.00464	4.06885	5.05465	4.45165	5.1108	1.12081	high
TCGA-13-0886	12.7808	0	3.42719	5.21107	3.43092	4.72642	6.67037	1.13251	high
TCGA-13-0888	7.70137	1	2.31928	2.40156	4.05163	1.53639	4.62911	1.22606	high
TCGA-13-0891	8.56986	1	2.53867	2.82313	1.80716	3.0384	2.65242	0.899517	low
TCGA-13-0893	3.6137	1	2.86404	4.32949	2.81358	5.03616	1.75517	0.990872	low
TCGA-13-0897	5.97808	1	2.67468	4.73898	2.79476	5.61529	7.2485	0.605015	low
TCGA-13-0900	11.1699	0	3.85827	4.74062	2.7484	5.81967	6.50785	0.833516	low
TCGA-13-0901	1.6137	0	3.41077	4.51657	3.42776	2.62054	6.24881	1.6637	high
TCGA-13-0906	9.91507	0	2.41459	3.40687	2.65171	5.29264	6.6336	0.47221	low
TCGA-13-0913	9.10959	0	1.76217	3.61001	3.4941	5.14464	7.17483	0.450066	low
TCGA-13-0916	4.89041	0	2.2264	3.73823	1.95129	5.54202	6.11253	0.436813	low
TCGA-13-0920	4.06575	1	2.57389	2.6585	1.6154	3.98615	7.70849	0.478865	low
TCGA-13-0923	6.97808	0	2.4534	4.36039	1.62394	3.4205	7.42065	0.778809	low
TCGA-13-1403	6.42466	1	3.1026	3.75949	2.43495	1.87654	8.1387	1.22833	high
TCGA-13-1405	2.37808	1	3.59841	4.83679	3.39014	4.66407	4.641	1.27799	high
TCGA-13-1407	6.94247	0	1.76903	2.22268	1.59968	1.89755	7.25311	0.59791	low
TCGA-13-1409	4.7726	1	2.16794	2.08984	6.09318	1.58086	8.19208	1.05085	high
TCGA-13-1411	1.45479	1	3.95995	7.21619	2.92779	6.13226	7.45084	1.28243	high
TCGA-13-1487	1.86575	1	3.33745	3.8083	2.59595	3.47447	5.78762	1.08085	high
TCGA-13-1488	5.90137	1	3.05175	3.63586	2.43967	5.88056	6.52226	0.504355	low
TCGA-13-1489	6.99452	1	3.65717	3.20832	1.9738	2.99554	6.49814	1.0376	high
TCGA-13-1495	7.53151	1	2.72118	4.17237	2.74203	4.58575	8.1387	0.650122	low
TCGA-13-1496	0.353425	1	1.76936	5.78017	1.9634	5.2311	5.53489	0.669163	low
TCGA-13-1498	5.51233	1	3.20241	4.79723	2.44931	5.25867	8.28228	0.69075	low
TCGA-13-1505	5.47397	0	3.45894	3.77688	3.10022	4.03658	8.06693	0.870341	low
TCGA-13-1507	5.46027	1	3.34248	6.04528	3.07095	5.62499	6.79186	1.01584	high
TCGA-13-1509	6.67945	0	3.98146	5.14184	3.08234	4.87083	5.86219	1.27884	high
TCGA-13-1511	4.52055	1	2.78118	4.12979	2.16162	2.20092	6.18011	1.25619	high
TCGA-13-1512	1.21096	0	3.01586	4.26938	2.36566	4.84569	8.5249	0.631702	low
TCGA-20-0991	2.18356	0	2.18685	6.92493	2.01589	7.59701	6.08098	0.523207	low
TCGA-20-1682	2.29315	0	3.80652	5.15602	4.19758	5.5056	3.45827	1.39867	high
TCGA-20-1687	0.221918	0	3.93749	4.64382	2.6933	4.30801	5.54214	1.27801	high
TCGA-23-1023	3.37808	0	2.83481	5.35594	1.7122	4.53296	5.61281	0.936251	low
TCGA-23-1026	2.23562	0	3.63232	5.92761	3.90259	5.0151	6.51613	1.38203	high
TCGA-23-1028	4.11781	0	2.3901	3.30578	1.88968	5.14746	6.62704	0.438957	low
TCGA-23-1029	0.734247	0	2.3261	4.40785	1.69912	2.77166	7.60907	0.883736	low
TCGA-23-1030	2.4274	0	3.49026	3.79714	3.11868	3.96342	6.74787	0.986631	low
TCGA-23-1107	0.0246575	1	2.06323	4.88206	5.13895	3.04198	5.81584	1.39031	high
TCGA-23-1110	4.54247	0	2.49967	2.4126	1.6643	1.72391	3.95223	1.0062	high
TCGA-23-1113	2.6	1	2.2809	4.11568	2.05018	1.74318	6.79655	1.15495	high
TCGA-23-1118	7.16712	0	2.51282	4.76014	3.31916	4.78334	7.49401	0.738099	low
TCGA-23-1123	2.78904	1	2.35026	6.46573	1.59759	4.97788	5.92346	0.902141	low
TCGA-23-2077	9.65753	0	2.5082	4.97905	1.60906	3.56613	4.83984	1.04261	high
TCGA-24-1103	4.50959	1	2.83398	3.05695	1.70201	2.64203	7.83073	0.773654	low
TCGA-24-1104	5.29589	1	2.719	5.17023	1.59521	4.52765	2.84464	1.04845	high
TCGA-24-1105	3.95068	1	3.80578	4.58868	1.68485	6.47519	6.73894	0.597529	low
TCGA-24-1418	0.665753	0	3.24934	4.68555	3.27832	3.77652	7.11958	1.15654	high
TCGA-24-1419	0.654795	0	1.81926	3.45916	3.04757	1.64786	6.09854	1.05788	high
TCGA-24-1423	0.520548	0	2.61935	3.17887	2.26561	4.49105	6.99106	0.540157	low
TCGA-24-1425	0.49589	0	4.42302	5.93046	3.37572	4.18802	6.36719	2.00058	high
TCGA-24-1427	0.40274	0	3.94298	5.67162	3.24354	4.56027	5.58962	1.58263	high
TCGA-24-1428	1.44932	0	2.18464	5.87747	1.59521	4.75919	7.57492	0.713859	low
TCGA-24-1431	1.55342	1	2.20673	5.14792	2.15061	3.88206	6.88317	0.845773	low
TCGA-24-1467	8.83288	1	1.72444	3.74197	1.60734	4.36442	7.55662	0.441135	low
TCGA-24-1469	0.758904	0	1.89525	3.4971	4.48606	4.2259	7.72592	0.607038	low
TCGA-24-1470	0.287671	0	2.16883	4.54559	3.33712	5.9559	8.77734	0.443132	low
TCGA-24-1471	0.0986301	0	3.02554	3.35929	1.78184	3.62539	5.6667	0.805622	low
TCGA-24-1544	2.24658	1	2.56155	3.1782	2.0576	2.42768	4.48359	1.02037	high
TCGA-24-1553	4.8411	1	2.57063	5.58239	1.7847	7.52564	7.35992	0.396116	low
TCGA-24-1558	1.6274	1	3.43983	3.97896	2.37169	2.09967	3.7485	1.80974	high
TCGA-24-1560	3.67397	1	1.94287	3.67675	1.66717	3.2383	6.93677	0.636628	low
TCGA-24-1565	0.854795	1	2.81359	5.52342	1.66784	2.19159	6.9592	1.5347	high
TCGA-24-1604	7.36438	1	3.16687	3.85092	1.76242	3.30103	5.79702	0.993696	low
TCGA-24-1843	0.290411	0	2.37085	6.03585	2.14131	4.17259	6.92275	0.992109	low
TCGA-24-1844	0.309589	0	2.19585	4.45688	1.81548	1.82173	6.33531	1.19997	high
TCGA-24-1923	1.89041	1	3.67277	4.15058	3.01174	2.13569	6.6676	1.72625	high
TCGA-24-1924	2.51781	1	2.49899	6.35645	2.81835	6.05241	8.0143	0.695326	low
TCGA-24-1928	0.920548	1	3.31262	6.0343	2.74969	4.41597	4.95888	1.47977	high
TCGA-24-2026	2.90137	1	2.20572	5.18432	2.22811	5.54648	5.90721	0.616322	low
TCGA-24-2036	5.33425	1	1.81877	4.13348	1.61028	1.62254	5.08731	1.13356	high
TCGA-24-2038	3.70959	1	3.28227	4.22307	6.21541	1.88151	8.09749	2.12373	high
TCGA-24-2254	4.75616	1	2.81217	5.335	2.23136	2.01102	6.74787	1.65814	high
TCGA-24-2267	3.96164	1	2.84372	5.79171	1.60568	7.31617	5.28771	0.53282	low
TCGA-24-2271	2.63562	1	3.37792	4.22463	2.89448	5.51526	6.58747	0.712267	low
TCGA-24-2281	3.71781	0	2.62474	5.80095	1.63598	7.02257	6.79345	0.487028	low
TCGA-24-2288	0.0684932	1	4.0021	5.68768	3.141	6.32695	4.78506	1.10401	high
TCGA-24-2289	5.6137	1	4.05626	6.34624	5.21106	2.74494	6.30104	3.4135	high
TCGA-24-2293	1.3863	1	4.62009	6.05465	3.71873	3.98716	4.34487	2.71984	high
TCGA-24-2297	4.65479	1	1.89376	3.04114	2.89493	2.41738	6.37138	0.792155	low
TCGA-25-1313	2.24658	1	2.72952	6.10979	1.97437	2.89121	5.64724	1.6264	high
TCGA-25-1315	4.33699	1	2.7038	3.02046	1.69283	1.96798	7.1362	0.914462	low
TCGA-25-1318	2.91507	1	3.85998	5.34605	1.83436	3.71619	2.89241	1.84473	high
TCGA-25-1319	5.41644	1	2.36242	5.5098	2.0277	4.0755	7.81944	0.840447	low
TCGA-25-1320	3.16438	1	3.73443	5.05804	3.02041	3.37904	5.97159	1.65874	high
TCGA-25-1321	2.83014	1	2.25565	4.09155	1.73755	3.37221	7.06375	0.731881	low
TCGA-25-1329	1.25205	1	3.91661	5.95348	2.68208	2.60985	6.24981	2.40107	high
TCGA-25-1623	1.54795	1	4.73673	6.02959	3.79414	6.13308	3.06448	1.83729	high
TCGA-25-1631	0.0246575	1	2.41867	5.76204	3.58087	2.58673	7.08182	1.59904	high
TCGA-25-1633	5.18082	1	3.89832	5.64957	3.07819	5.84845	5.05111	1.16474	high
TCGA-25-1635	4.33699	1	3.83446	5.61716	4.9156	4.17553	5.50566	1.99933	high
TCGA-25-1870	1.24658	1	2.19134	4.62469	1.71668	2.24471	7.27906	1.03861	high
TCGA-25-1877	2	1	2.60591	4.45487	1.6825	5.63865	5.22004	0.570413	low
TCGA-25-2396	0.252055	1	2.35145	4.90386	2.33944	4.59999	7.2766	0.69713	low
TCGA-25-2399	1.66575	1	3.16369	6.08444	3.07428	4.6272	7.40689	1.18856	high
TCGA-25-2400	3.50137	1	2.26755	4.59683	4.21231	3.44339	2.99306	1.38984	high
TCGA-25-2404	2.41918	1	3.72938	5.38144	2.37439	4.83936	6.52226	1.12157	high
TCGA-29-1688	6.57534	1	3.04814	6.39248	2.7846	4.54147	5.33395	1.40926	high
TCGA-29-1691	4.0274	1	2.28014	5.26232	3.62855	4.43305	6.24391	0.946379	low
TCGA-29-1693	8.48219	0	3.16859	4.7694	2.66135	3.40005	7.40152	1.15844	high
TCGA-29-1694	3.25205	1	4.42161	4.63094	2.08489	3.4708	6.05362	1.60919	high
TCGA-29-1695	3.36712	1	3.74935	5.87543	4.44713	4.6102	5.22557	1.80438	high
TCGA-29-1697	2.6	1	1.86128	3.74798	3.49389	2.32999	8.43453	0.858192	low
TCGA-29-1701	1.41096	1	3.51346	5.793	4.98681	4.85887	7.96386	1.36674	high
TCGA-29-1711	2.88493	0	2.42586	5.09378	2.21571	6.37833	9.89833	0.395951	low
TCGA-29-1761	1.44658	1	3.94942	5.34281	5.06685	5.73301	2.6012	1.66755	high
TCGA-29-1763	5.56712	0	1.9565	5.62392	1.70658	3.42548	7.65344	0.882021	low
TCGA-29-1770	2.03014	0	3.71908	4.92506	2.73476	2.38253	3.81768	2.30584	high
TCGA-29-1777	1.02466	0	3.64414	4.91098	5.18111	5.06693	6.03591	1.30583	high
TCGA-29-1778	1.24384	0	2.04112	4.23831	1.60305	5.42295	5.95564	0.463325	low
TCGA-29-1781	0.69863	0	2.9134	6.13116	2.03417	7.82311	6.51261	0.495687	low
TCGA-29-1783	0.60274	0	3.20077	5.80429	3.03298	5.97338	4.84474	0.975636	low
TCGA-29-2414	7.18082	1	2.44235	3.43425	2.12454	4.89757	7.72473	0.461029	low
TCGA-29-2427	5.20548	0	2.91964	6.23883	2.46494	6.55249	7.06192	0.694547	low
TCGA-29-2428	3.7589	0	2.25011	4.84357	2.07824	7.41697	3.31998	0.436812	low
TCGA-29-A5NZ	2.98082	1	3.49805	3.96403	2.15271	4.02099	6.00841	0.96136	low
TCGA-30-1714	3.1726	1	2.25731	3.49638	4.56159	2.15527	7.43133	1.13505	high
TCGA-30-1857	0.0219178	1	3.93497	4.48802	3.40287	5.612	7.14708	0.868494	low
TCGA-30-1892	4.06575	1	3.61912	5.07916	3.87242	3.49096	3.48033	2.04969	high
TCGA-31-1944	3.79726	0	3.62086	4.87893	2.70507	4.33119	8.22533	1.01571	high
TCGA-31-1946	2.51507	0	3.3975	5.68944	2.99928	4.36749	6.73748	1.2895	high
TCGA-31-1950	1.56438	0	1.9472	5.06301	1.84362	5.05142	5.39744	0.627878	low
TCGA-31-1951	1.87397	0	3.44008	5.76327	3.87289	5.92771	7.05054	0.975983	low
TCGA-36-1568	2.39726	0	2.97403	4.67294	1.60681	4.8035	8.99206	0.614031	low
TCGA-36-1570	1.79452	0	1.8951	3.71335	1.65459	3.26629	4.16134	0.764031	low
TCGA-36-1571	1.90411	1	2.85527	3.78968	1.76694	2.38528	6.35749	1.08053	high
TCGA-36-1574	1.87945	0	3.47987	5.09653	2.57375	5.11851	7.52632	0.877464	low
TCGA-36-1577	2.14521	0	2.32044	4.01762	1.60547	1.59392	3.70425	1.40651	high
TCGA-36-1581	2.05753	0	2.42709	4.4949	1.65875	7.8155	3.19507	0.373211	low
TCGA-57-1582	2.00274	1	2.72019	4.62877	5.74057	5.01365	7.49401	0.927302	low
TCGA-57-1584	1.76164	0	1.95357	4.35983	2.21915	2.66827	6.07607	0.95378	low
TCGA-57-1586	1.86027	0	2.50356	3.2958	1.73297	4.41822	3.98236	0.638284	low
TCGA-57-1994	2.08493	0	1.84219	4.7347	1.69651	7.19085	6.3703	0.312485	low
TCGA-59-2348	15.0164	0	3.24063	5.0511	3.04092	4.37985	2.17054	1.4909	high
TCGA-59-2350	1.86027	1	2.63737	4.3772	2.08401	3.88206	8.65371	0.707498	low
TCGA-59-2351	9.67671	0	2.66697	5.23005	1.83632	6.53498	7.76603	0.468002	low
TCGA-59-2352	0.783562	1	3.37745	4.67231	1.7014	5.38438	4.10039	0.849484	low
TCGA-59-2354	2.86575	1	3.82545	5.75209	3.43642	6.18427	7.0229	0.972666	low
TCGA-59-2355	0.178082	1	3.3661	5.27385	6.35917	5.1825	6.91919	1.35305	high
TCGA-59-2363	0.452055	0	1.8753	3.77233	4.23805	2.57905	6.08762	1.04079	high
TCGA-59-A5PD	1.70959	1	2.89084	2.91556	1.60053	4.926	5.55756	0.510795	low
TCGA-61-1721	0.926027	0	3.98351	5.81667	2.52716	2.53021	2.70687	3.05789	high
TCGA-61-1725	2.61918	0	3.26294	5.2876	2.76935	4.96489	6.79502	0.960853	low
TCGA-61-1728	2.32329	0	2.35962	4.53935	1.95753	3.32594	6.13934	0.914682	low
TCGA-61-1733	2.64932	0	3.46318	4.87487	2.1154	3.33412	6.93508	1.27233	high
TCGA-61-1907	2.60822	0	1.88035	5.37058	6.73939	5.95945	6.85799	0.799322	low
TCGA-61-1911	3.54247	0	2.39406	4.3052	1.70768	7.08379	5.12324	0.371778	low
TCGA-61-1995	0.167123	0	1.94367	5.69959	1.72346	5.21081	6.28095	0.641179	low
TCGA-61-1998	0.460274	0	3.71229	5.84257	6.64953	3.89472	6.99294	2.34665	high
TCGA-61-2000	1.20822	0	2.62604	5.40104	2.35712	3.28258	8.35574	1.06468	high
TCGA-61-2002	1.49863	0	3.74572	5.81734	3.75513	6.49584	7.93871	0.867989	low
TCGA-61-2009	3.32055	0	3.77523	5.99586	2.8479	6.09073	4.92179	1.12648	high
TCGA-61-2088	0.39726	0	1.67006	3.41872	2.27043	1.94682	8.10762	0.749387	low
TCGA-61-2092	4.30959	0	1.61809	2.8655	2.1438	1.85109	2.65642	0.97424	low
TCGA-61-2097	5.05205	0	3.71369	5.21408	2.91471	2.80247	5.67597	1.97816	high
TCGA-61-2098	5.46027	0	2.19453	3.13739	1.60163	2.07811	5.4527	0.886454	low
TCGA-61-2102	0.539726	1	4.05318	6.56795	5.96597	1.76876	3.12201	6.12814	high
TCGA-61-2104	6.40548	0	1.92133	4.08975	1.70079	5.31352	6.02434	0.44858	low
TCGA-61-2110	3.70959	1	3.34344	4.65558	4.63657	1.99988	7.4594	2.03767	high
TCGA-61-2113	1.85205	1	3.85285	5.4938	3.37323	4.9656	5.90059	1.33762	high
TCGA-OY-A56Q	1.57808	0	2.19905	2.46042	1.63553	1.64675	5.40007	0.859014	low
GSM657529	7.48	0	1.56566	3.08944	3.7008	3.35061	7.04427	0.606958	low
GSM657534	2.51	1	2.55381	5.08164	4.04407	3.98415	6.83826	1.09521	high
GSM657536	2.45	1	3.17575	5.32078	2.723	3.42532	4.71045	1.57833	high
GSM657537	3.58	0	2.51246	6.38486	1.96544	6.22119	9.52721	0.55383	low
GSM657542	2.3	1	4.00717	4.81495	1.99535	3.95104	5.47066	1.37451	high
GSM657547	1.03	1	2.3901	4.7318	2.81942	3.231	5.81576	1.10134	high
GSM657549	0.17	1	2.66976	6.17894	2.93276	4.58159	2.98537	1.44242	high
GSM657554	6.29	1	3.14488	3.21328	3.00437	4.76527	8.78412	0.559748	low
GSM657556	3.83	1	2.04684	4.63616	2.43954	3.60432	3.6571	1.0051	low
GSM657557	2.71	0	2.75645	4.57684	3.42473	3.5296	7.44143	1.04131	high
GSM657558	2.84	1	3.15577	6.03595	4.06079	4.20913	4.51015	1.76689	high
GSM657559	6.3	1	3.30962	4.15513	2.39383	4.16322	5.64883	0.967014	low
GSM657563	2.48	0	3.03821	3.88103	2.30716	2.87765	4.56392	1.23544	high
GSM657568	1.28	1	3.2304	5.28945	5.10556	2.65225	4.96936	2.41967	high
GSM657569	2.16	0	1.89052	4.31928	1.58105	2.36673	6.56882	0.902624	low
GSM657570	2.83	1	4.42494	5.78347	6.99365	2.99128	4.92961	4.19402	high
GSM657572	2.06	0	3.96362	5.17604	4.43103	5.67713	6.18524	1.18946	high
GSM657573	1.59	1	4.05037	4.27539	3.36581	3.97311	4.50425	1.52569	high
GSM657575	0.56	1	3.3028	4.31438	2.13866	3.90146	7.30092	0.921375	low
GSM657577	2.96	1	3.49859	4.79303	4.69683	4.16768	4.72568	1.58432	high
GSM657581	3.18	1	2.96944	3.31596	4.652	3.46932	7.1815	0.992682	low
GSM657582	8.8	1	2.33207	6.4335	1.06364	3.84671	7.1188	1.01728	high
GSM657584	6.75	1	2.51655	3.78234	1.5035	2.45524	6.6589	0.921166	low
GSM657585	0.86	1	5.37733	4.64647	3.06453	5.43183	3.52117	1.73054	high
GSM657587	3.64	1	3.15699	4.51267	4.63041	6.66571	4.41359	0.756484	low
GSM657591	0.59	1	2.8775	5.6694	1.97523	5.65934	7.39991	0.699584	low
GSM657596	3.95	1	3.78853	6.07798	1.7346	1.91021	2.99137	3.20907	high
GSM657599	3.5	1	1.67383	3.54769	1.85059	2.21504	3.96608	0.925998	low
GSM657600	8.64	1	2.28978	7.03711	4.91221	7.35132	7.20884	0.732678	low
GSM657602	2.2	1	3.9715	4.14178	1.91866	2.93073	8.77566	1.18528	high
GSM657603	1.72	1	3.44125	4.679	3.87421	3.72503	5.33371	1.48792	high
GSM657604	0.98	1	3.47417	5.56446	2.9562	4.25146	5.54386	1.42779	high
GSM657607	0.33	1	2.59515	3.83532	2.2852	3.05277	6.96282	0.87594	low
GSM657608	1.3	1	1.7721	5.32247	5.77586	3.41065	8.37892	1.15202	high
GSM657611	2.52	1	4.3527	5.61153	2.42937	5.82817	7.70572	1.01748	high
GSM657612	4.53	1	3.10263	5.05543	2.86393	2.79645	7.1505	1.45407	high
GSM657613	0.92	1	3.08717	5.25752	1.74918	3.89356	8.50572	0.937801	low
GSM657614	2.4	1	2.59596	4.29979	3.26939	2.59491	7.18965	1.17878	high
GSM657616	2.32	1	2.58838	4.27662	2.24706	3.9913	6.9673	0.762667	low
GSM657617	3.5	1	2.37245	3.19931	1.75755	2.45078	5.17025	0.893696	low
GSM657622	1.55	1	3.18205	5.50423	4.11508	5.75123	4.19325	1.12746	high
GSM657628	0.35	1	2.78915	4.68552	1.95946	4.14111	7.8429	0.77293	low
GSM657629	2.89	1	2.27601	3.85935	1.40338	2.28396	8.43483	0.797956	low
GSM657630	7.85	1	2.34776	4.03332	1.59618	2.65589	7.25452	0.856196	low
GSM657632	3.55	1	4.1422	4.07794	3.7824	6.29882	4.25139	0.911168	low
GSM657638	3.95	1	2.92953	3.79643	2.54939	4.12511	4.46155	0.901351	low
GSM657641	0.82	1	2.30087	4.74156	3.03979	3.62773	6.29129	0.96895	low
GSM657643	1.48	1	3.00061	3.79643	2.07898	2.78159	5.5155	1.12211	high
GSM657647	1.34	1	3.49451	4.50372	3.34778	3.42383	4.07779	1.61648	high
GSM657648	9.02	1	2.02809	4.36621	2.29102	5.67137	7.96943	0.41685	low
GSM657654	13.5	0	2.10254	4.32629	0.547473	3.3904	7.93214	0.60961	low
GSM657658	1.98	1	2.79069	5.72751	3.30286	3.53803	8.0818	1.26401	high
GSM657660	0.82	1	2.68355	3.86433	2.1886	4.2775	5.44349	0.740586	low
GSM657661	3.19	1	2.46308	4.62383	2.4917	1.85841	8.60194	1.21296	high
GSM657664	0.4	1	1.98768	5.90395	3.62307	5.86906	5.87407	0.727078	low
GSM657669	2.33	1	3.71506	4.79379	2.20903	5.00152	5.33305	1.01341	high
GSM657670	10.87	1	1.70611	5.88305	2.55136	9.44282	5.93978	0.252034	low
GSM657671	8.46	1	1.91728	4.19285	2.66566	3.67106	5.94133	0.757542	low
GSM657674	1.37	1	2.71964	6.74691	2.75816	3.32818	6.48771	1.71113	high
GSM657675	6.81	1	2.00986	2.90495	1.44475	3.2906	6.98185	0.529097	low
GSM657676	1.84	1	3.42277	4.2823	1.97395	3.31929	3.79408	1.36901	high
GSM657677	1.66	1	2.29562	5.82715	1.31246	1.95984	8.8034	1.27165	high
GSM657678	0.88	1	4.02804	6.89109	4.81398	4.3168	3.73046	2.99407	high
GSM657679	0.8	1	3.56392	7.25414	3.70141	6.96453	6.23793	1.12263	high
GSM657680	2.03	1	2.66542	3.71602	1.4157	2.93644	6.74577	0.829436	low
GSM657683	2.25	1	3.31884	4.16478	2.16109	2.63067	7.16662	1.23199	high
GSM657684	0.56	1	3.17079	4.86642	1.22683	1.80413	4.39378	1.84712	high
GSM657688	6.49	1	2.70842	3.05353	1.7845	4.73602	7.36805	0.470199	low
GSM657693	5.4	1	2.9199	3.26776	2.7496	2.59312	5.91106	1.07154	high
GSM657694	2.54	1	5.6153	5.34624	3.06934	3.83938	4.06736	3.02666	high
GSM657695	4.67	1	1.99718	2.91098	2.15937	3.09328	5.39649	0.667568	low
GSM657696	5.27	0	3.16332	5.28768	5.51009	4.98483	9.3335	1.03876	high
GSM657697	0.52	1	3.40055	4.93031	2.57611	3.95042	5.56659	1.26136	high
GSM657699	0.71	1	2.92477	3.21688	3.87918	2.12894	2.53613	1.69629	high
GSM657700	3.94	1	2.54851	4.36165	1.81885	3.6716	3.82032	0.990131	low
GSM657703	4.46	0	2.11715	3.16701	2.1886	3.00248	6.49104	0.691217	low
GSM657704	1.81	1	2.1409	4.26956	2.04382	3.15185	7.19512	0.794991	low
GSM657707	0.74	1	3.52716	4.9472	3.76855	4.68216	4.35182	1.35702	high
GSM657708	4.96	0	2.75301	4.67674	2.14944	5.35717	6.19196	0.653278	low
GSM657711	4.66	0	3.5346	7.90307	4.05488	4.71166	8.00424	2.01574	high
GSM657713	3.73	1	2.83874	5.25558	2.29415	3.96883	6.62036	1.04086	high

## Sheet: test cohort
id	futime	fustat	GFPT2	VSIG4	HOXA5	CXCL9	LYPD1	riskScore	risk
TCGA-04-1332	3.41644	1	3.71562	4.79258	1.9081	2.58775	5.89849	1.6872	high
TCGA-04-1338	3.88493	0	4.26917	6.05704	3.65359	7.2951	6.6003	0.944492	low
TCGA-04-1341	0.090411	0	2.34334	3.67314	2.24505	3.04239	7.75457	0.746037	low
TCGA-04-1343	0.989041	1	3.18601	4.89427	3.05183	3.03926	3.96065	1.73159	high
TCGA-04-1347	5.25753	0	2.36643	3.08565	1.82743	2.66151	5.51785	0.813759	low
TCGA-04-1356	4.10685	1	2.7886	3.64291	1.86419	2.83339	7.37258	0.868361	low
TCGA-04-1364	2.80548	1	2.61107	1.98931	1.79631	1.7948	5.50453	0.846965	low
TCGA-04-1365	6.38082	0	2.23945	4.78373	2.30076	5.32095	7.25311	0.552741	low
TCGA-04-1514	4.71233	1	2.14867	2.67527	1.85545	2.60354	4.61185	0.762062	low
TCGA-04-1530	9.92329	1	3.73129	4.9643	2.44763	6.67619	6.78589	0.65264	low
TCGA-04-1536	2.42466	1	4.28903	4.7986	3.1368	2.83509	3.53703	2.50115	high
TCGA-04-1542	7.01644	1	1.7225	2.57425	1.68324	1.67303	6.04719	0.737612	low
TCGA-04-1648	2.3863	1	1.62627	4.29525	4.09044	4.00818	9.50109	0.596223	low
TCGA-04-1655	3.78082	1	2.46182	2.89759	1.69077	1.55784	5.37504	1.04229	high
TCGA-09-0366	4.8137	1	2.42958	7.79923	3.70332	2.9687	5.60452	2.53543	high
TCGA-09-0367	1.49863	1	3.18601	4.4566	2.17432	4.20303	4.60544	1.03847	high
TCGA-09-0369	2.96438	1	2.26755	5.34368	2.25408	2.1057	4.77053	1.61352	high
TCGA-09-1665	3.46849	1	2.34303	3.91406	1.65	4.57269	7.13211	0.53296	low
TCGA-09-1666	4.8	0	2.57865	4.63724	2.68097	6.20905	7.27215	0.493155	low
TCGA-09-1667	5.15616	0	3.0174	5.62844	2.04956	6.37335	8.2527	0.575675	low
TCGA-09-1670	1.49863	0	2.24359	5.17144	2.46611	3.34584	8.07173	0.928791	low
TCGA-09-1673	0.252055	0	2.1049	4.98884	1.74356	2.2583	7.17697	1.10353	high
TCGA-09-2051	5.25753	0	3.04192	5.15476	3.76355	2.9492	5.45856	1.74418	high
TCGA-09-2054	1.74521	1	2.48544	5.4484	4.68599	3.74487	4.51751	1.55151	high
TCGA-10-0927	6.82192	1	2.6287	3.24898	1.68008	2.10559	7.85492	0.863761	low
TCGA-10-0928	1.54247	1	2.33006	2.68558	1.72881	1.79604	7.50298	0.78435	low
TCGA-10-0931	2.73973	1	2.15608	3.86188	1.72594	2.69313	7.63459	0.766498	low
TCGA-10-0933	1.22192	1	2.0895	2.71088	2.98383	2.09222	3.96612	1.00739	high
TCGA-10-0936	3.07671	1	2.38247	3.32643	1.59659	3.58777	4.03764	0.745549	low
TCGA-10-0937	1.66575	1	2.70565	5.08663	2.38386	3.247	4.76981	1.32547	high
TCGA-10-0938	1.74247	1	2.08451	1.65517	1.62476	1.78223	6.20627	0.640911	low
TCGA-13-0714	0.517808	1	3.26896	4.86964	2.76857	3.71334	6.57341	1.20913	high
TCGA-13-0726	2.6	1	2.93606	3.84214	2.11271	3.29682	7.86698	0.836104	low
TCGA-13-0730	1.48493	1	4.66816	4.97754	5.63009	2.3014	4.98977	3.84504	high
TCGA-13-0762	9.31507	0	2.23924	2.56968	1.7908	1.93419	3.7485	0.947212	low
TCGA-13-0765	3.80548	1	4.83641	4.55949	5.82354	2.28465	3.34791	4.23722	high
TCGA-13-0766	4.72603	1	2.88276	4.76774	4.26528	3.36743	5.5002	1.46219	high
TCGA-13-0795	1.69589	1	2.28866	5.53737	6.1496	4.14053	3.80045	1.67215	high
TCGA-13-0800	7.29041	0	2.29747	2.15551	1.59521	1.55542	4.10598	0.922205	low
TCGA-13-0804	2.93973	1	1.98997	6.16297	2.05547	3.53153	8.16513	0.973613	low
TCGA-13-0883	5.74521	1	4.32739	5.71588	2.84533	4.57928	5.98871	1.64603	high
TCGA-13-0885	9.28219	0	2.37165	4.68232	2.23497	7.18682	7.45378	0.350289	low
TCGA-13-0887	5.55616	1	2.97053	5.01228	3.14376	2.0642	7.11532	1.71193	high
TCGA-13-0905	10.263	0	3.71133	2.83538	4.50678	3.2012	6.68321	1.19332	high
TCGA-13-0908	5.04932	1	3.68824	5.48356	2.99288	4.54117	4.57237	1.49145	high
TCGA-13-0911	3.71233	1	4.13188	5.69656	5.13622	3.09457	6.97135	2.64024	high
TCGA-13-0924	7.16164	0	3.30878	5.98612	3.77036	6.05993	6.29607	0.997883	low
TCGA-13-1404	6.76438	0	3.16369	4.31809	2.68499	4.16894	6.13397	0.957426	low
TCGA-13-1408	4.60274	1	3.97257	4.26082	3.76475	5.40425	3.8781	1.14987	high
TCGA-13-1410	6.75068	0	3.33054	4.7022	3.50468	4.56827	7.09557	1.00591	high
TCGA-13-1477	4.55342	1	2.36524	3.45802	1.63989	3.68884	5.58725	0.670718	low
TCGA-13-1483	2.45205	1	3.27238	4.56616	2.83091	3.18112	6.78736	1.27894	high
TCGA-13-1485	1.72329	1	4.37927	4.31471	2.92468	2.37271	4.00186	2.44663	high
TCGA-13-1492	10.463	1	1.8	3.98825	4.48179	2.08216	7.02488	1.15566	high
TCGA-13-1497	10.6055	0	2.70444	4.38399	6.02033	4.45437	4.42448	1.28258	high
TCGA-13-1499	9.58904	0	3.95287	4.64135	3.46978	6.41074	6.77821	0.768832	low
TCGA-13-1501	3.6	1	3.40788	3.7548	3.64681	3.3076	7.73308	1.1044	high
TCGA-13-1506	2.84658	1	2.86849	3.85896	1.92882	2.87104	7.58096	0.913515	low
TCGA-13-1510	3.72329	1	3.00726	3.02949	2.00749	4.37367	5.75288	0.635246	low
TCGA-13-2060	6.49041	0	2.76487	5.135	2.08963	7.12902	6.53453	0.457302	low
TCGA-13-A5FT	5.87123	0	2.2365	2.65425	4.00445	2.87377	6.80599	0.782203	low
TCGA-20-0987	1.92055	1	2.57118	7.06826	1.69297	5.51227	6.45102	0.931718	low
TCGA-20-1683	2.11507	0	3.77017	3.57824	2.94105	4.14205	3.02724	1.24205	high
TCGA-20-1686	0.243836	0	1.88362	3.45028	2.71616	2.75296	2.25713	1.04251	high
TCGA-23-1021	3.96164	1	2.7178	4.0658	1.70075	1.75082	8.75127	1.07874	high
TCGA-23-1022	4.13973	1	2.39925	3.67151	4.79625	2.73288	3.71519	1.41927	high
TCGA-23-1024	1.28219	0	2.60367	2.25769	1.66974	2.83887	8.99206	0.536958	low
TCGA-23-1027	2.67397	1	3.38981	5.169	2.3436	2.53749	6.64306	1.68193	high
TCGA-23-1109	4.27945	1	2.38219	4.35022	2.21753	3.29948	4.97536	0.992646	low
TCGA-23-1111	0.268493	0	2.48841	3.33414	1.91082	1.90081	7.64418	0.924952	low
TCGA-23-1114	5.72329	1	3.22915	3.31301	1.81292	1.57753	7.63142	1.20615	high
TCGA-23-1116	1.62192	1	4.38182	5.5276	5.08644	3.89882	4.95847	2.57515	high
TCGA-23-1119	10.8301	0	2.22961	5.83229	2.31679	5.89688	7.67356	0.583097	low
TCGA-23-1120	0.356164	0	2.64283	5.01834	1.69018	5.55985	7.78874	0.552694	low
TCGA-23-1122	3.25753	1	2.16706	4.29991	2.18784	3.33297	6.80278	0.805217	low
TCGA-23-1809	0.0438356	0	2.94149	3.3337	2.17749	3.08311	7.89568	0.795094	low
TCGA-23-2078	7.29041	0	3.2586	4.865	2.74818	5.94075	6.01463	0.731109	low
TCGA-23-2084	4.15342	1	3.58996	5.67881	1.83543	2.93799	4.98138	1.91528	high
TCGA-24-0966	0.635616	0	1.79284	4.37405	1.66653	2.89795	7.29338	0.750191	low
TCGA-24-0968	1.63836	1	3.40459	6.3452	3.46911	4.60932	5.22186	1.63832	high
TCGA-24-0970	0.969863	1	3.80578	4.75918	3.35928	1.96637	5.91974	2.32011	high
TCGA-24-0979	3.46301	1	2.51742	3.52059	1.76697	3.24383	3.78646	0.907423	low
TCGA-24-0982	1.86027	1	2.68901	3.51248	1.73592	3.3325	6.23628	0.779131	low
TCGA-24-1413	0.526027	0	2.09086	4.74557	4.69188	2.74299	8.70243	1.13814	high
TCGA-24-1416	0.531507	0	2.41391	4.32088	1.71675	2.44683	6.3021	1.05556	high
TCGA-24-1417	0.652055	0	3.75906	6.21228	2.91369	4.60748	6.90355	1.46986	high
TCGA-24-1422	0.0630137	1	3.79921	5.75586	3.35883	3.64906	4.4106	2.12266	high
TCGA-24-1424	0.50137	0	2.84667	5.35119	4.03986	4.04713	5.8508	1.32565	high
TCGA-24-1426	0.446575	0	2.79674	4.96836	2.13267	1.7775	4.52827	1.87001	high
TCGA-24-1430	2.36438	1	2.17884	3.40733	1.92785	1.854	6.88664	0.922953	low
TCGA-24-1434	1.55616	1	4.36122	6.41929	3.64591	5.65148	4.18651	1.84086	high
TCGA-24-1435	3.6274	1	3.89256	4.94148	2.56284	5.18086	8.0379	0.901533	low
TCGA-24-1464	1.03836	1	2.08287	4.80345	1.83253	3.87361	7.26726	0.716793	low
TCGA-24-1474	1.85205	1	1.92211	6.14655	1.6839	3.13025	3.92463	1.36047	high
TCGA-24-1546	5.35616	1	3.94823	4.89712	3.60023	3.59706	6.54205	1.64605	high
TCGA-24-1549	4.71507	1	1.95783	3.46527	1.94388	4.69835	7.57786	0.423082	low
TCGA-24-1550	3.42192	1	3.92571	6.3659	4.5739	5.43239	4.88424	1.78926	high
TCGA-24-1551	4.32603	1	2.34069	6.03118	2.35685	5.35527	5.96318	0.809267	low
TCGA-24-1552	3.44932	1	2.41725	4.83984	1.83145	3.30465	4.44332	1.10715	high
TCGA-24-1557	3.32329	1	2.00402	5.16066	1.64612	4.39071	5.70437	0.731614	low
TCGA-24-1562	3.79178	1	3.14888	4.53846	4.98229	3.76848	7.06987	1.31242	high
TCGA-24-1563	3.97534	1	3.95213	5.28493	3.32149	3.38882	7.12791	1.753	high
TCGA-24-1567	1.43562	1	2.2169	3.49124	4.35787	1.88562	4.49534	1.44067	high
TCGA-24-1603	7.51233	1	2.80107	4.56864	2.04047	3.48985	8.00046	0.882623	low
TCGA-24-1616	3.1863	1	2.93305	4.11964	1.65446	3.17979	6.81227	0.935586	low
TCGA-24-1842	0.693151	0	3.54204	4.76906	2.96625	5.79249	5.85358	0.829916	low
TCGA-24-1845	0.317808	0	2.08985	4.9569	3.99873	4.24291	2.76954	1.17121	high
TCGA-24-1846	0.364384	0	3.58945	4.53567	2.44043	4.66533	7.43133	0.888438	low
TCGA-24-1847	0.939726	0	3.25098	5.28715	3.78905	7.60274	5.87234	0.602799	low
TCGA-24-1850	0.460274	0	3.86827	6.11915	3.65839	5.48577	3.52223	1.64944	high
TCGA-24-1930	6.7589	1	3.36956	6.2361	2.35042	6.42404	3.49831	1.02784	high
TCGA-24-2020	12.6685	1	2.64943	4.13482	4.22359	3.06622	2.65091	1.56996	high
TCGA-24-2023	3.73699	1	3.04877	5.58123	4.68297	4.35192	6.91037	1.35717	high
TCGA-24-2024	4.84658	1	2.91944	5.01077	2.15419	3.42315	8.4072	1.00067	low
TCGA-24-2027	9.14247	1	2.3901	2.8434	4.00391	3.4756	4.85313	0.842834	low
TCGA-24-2033	1.53973	1	2.967	5.66053	3.1053	3.70105	7.19224	1.31082	high
TCGA-24-2035	2.34795	1	4.5301	7.04386	6.20186	5.57852	8.92237	2.0999	high
TCGA-24-2261	0.0657534	1	3.21228	6.27492	2.42302	6.79849	7.36225	0.696227	low
TCGA-24-2262	0.030137	1	2.91382	4.39033	2.5263	5.2805	2.83113	0.862687	low
TCGA-24-2280	5.87123	0	3.87849	5.78082	3.89702	2.32196	5.47145	2.94801	high
TCGA-24-2290	3.01918	1	2.72133	5.95783	1.94084	3.15153	7.23941	1.31434	high
TCGA-24-2298	4.43836	1	3.78078	4.32003	2.93139	2.59961	2.12551	2.25108	high
TCGA-25-1312	0.0849315	1	2.86617	4.82457	4.20422	2.85633	4.9951	1.71567	high
TCGA-25-1316	3.50411	1	2.08691	3.708	4.44937	5.51727	4.46956	0.614141	low
TCGA-25-1317	0.167123	1	3.1377	4.23051	2.65993	3.57643	5.19753	1.14675	high
TCGA-25-1322	0.249315	1	3.2038	6.53071	4.06983	2.37024	6.83183	2.63168	high
TCGA-25-1323	1.08219	1	2.81341	5.06845	4.36561	1.96863	4.60509	2.30625	high
TCGA-25-1326	3.42192	1	3.57159	6.33503	4.35177	6.45166	6.66205	1.0883	high
TCGA-25-1328	5.50411	1	4.3465	4.95836	1.86816	3.41309	7.65983	1.49583	high
TCGA-25-1626	1.41918	1	4.64541	6.37328	4.43015	4.02486	4.79649	3.032	high
TCGA-25-1627	1.07945	1	2.72133	4.37748	1.6938	2.89881	6.61471	1.01652	high
TCGA-25-1628	1.71781	1	3.35394	5.68116	2.8695	6.60136	4.92065	0.832751	low
TCGA-25-1630	3.18356	1	2.83243	6.14214	1.84053	3.14643	7.06375	1.41307	high
TCGA-25-1632	4.92877	1	1.79689	3.80197	1.79891	1.82167	8.76937	0.787598	low
TCGA-25-1634	2.98904	1	2.09183	2.25583	1.59521	1.82648	7.06006	0.677595	low
TCGA-25-2042	1.08493	1	5.21029	5.99355	4.1963	3.18024	3.69455	4.21517	high
TCGA-25-2391	4.08767	1	2.59724	5.15476	2.97986	2.55419	5.81919	1.5257	high
TCGA-25-2392	0.0849315	1	2.31719	7.43792	1.7965	3.877	4.21358	1.65093	high
TCGA-25-2393	3.16986	1	3.01166	4.92863	1.62666	4.29197	7.99138	0.796711	low
TCGA-25-2398	3.75068	1	4.4373	5.21576	2.89429	4.27345	5.5867	1.69751	high
TCGA-25-2401	0.246575	1	4.12807	6.70306	2.61979	5.32937	7.88744	1.37108	high
TCGA-25-2409	2.24932	1	3.47467	6.27994	2.27332	4.5522	7.01332	1.2973	high
TCGA-29-1690	3.96712	1	4.49364	6.98721	1.59521	4.19835	8.32444	1.83872	high
TCGA-29-1696	2.8274	1	1.82438	3.45526	2.29512	3.9138	7.17028	0.525253	low
TCGA-29-1703	4.9726	1	2.40813	4.41096	2.26416	3.75496	7.79272	0.747601	low
TCGA-29-1705	1.52055	1	3.72527	5.17434	2.81657	3.94101	5.73906	1.47378	high
TCGA-29-1707	3.49863	0	1.99584	3.96684	1.64857	2.60944	6.99657	0.794364	low
TCGA-29-1710	2.60548	1	3.24043	5.35212	3.52667	6.35431	2.85911	0.990365	low
TCGA-29-1762	7.21644	1	1.9478	4.84916	1.77503	1.56976	7.31982	1.20346	high
TCGA-29-1766	3.28493	1	3.18233	4.61522	3.347	3.76397	7.2485	1.12012	high
TCGA-29-1768	2.60822	1	4.15863	5.10001	4.16989	5.33739	7.78501	1.16404	high
TCGA-29-1769	1.91507	0	3.12298	4.96836	2.46322	3.54737	7.35504	1.13186	high
TCGA-29-1774	1.44384	0	2.51944	3.69437	4.29382	1.62353	7.43931	1.40405	high
TCGA-29-1776	0.986301	0	2.8632	4.27159	2.4148	2.85046	8.33648	0.998691	low
TCGA-29-1784	0.446575	0	2.38126	5.58123	2.40428	6.97275	3.19815	0.615168	low
TCGA-29-1785	3.02466	1	2.41374	5.72389	2.13871	7.04643	9.08128	0.403614	low
TCGA-29-2425	5.41644	0	2.16261	3.7401	1.91338	5.28138	7.3005	0.418875	low
TCGA-30-1718	4.32603	1	3.62155	4.92719	3.21295	3.89808	6.46815	1.36042	high
TCGA-30-1853	3.02192	1	2.84003	2.48804	1.81941	1.73375	6.57205	0.94557	low
TCGA-30-1860	3.74247	1	3.05896	5.72631	2.57878	7.43331	4.7492	0.623372	low
TCGA-30-1861	2.89863	1	3.82067	3.83483	2.78855	3.29657	4.03874	1.49376	high
TCGA-30-1862	0.509589	1	3.20217	4.74955	2.85727	4.15107	5.13152	1.16392	high
TCGA-30-1866	3.05205	1	2.10876	4.18846	2.04932	4.89951	4.36828	0.620971	low
TCGA-30-1891	2.50411	1	4.83769	5.34012	3.62623	4.42932	5.45908	2.04029	high
TCGA-31-1953	0.558904	0	3.23488	5.95498	2.72406	6.45166	3.76613	0.946416	low
TCGA-31-1956	3.67671	0	3.99555	6.7549	3.12475	8.69352	7.20797	0.65792	low
TCGA-31-1959	0.183562	0	4.71419	5.67881	4.57967	3.86517	5.10955	2.75246	high
TCGA-36-1569	2.42466	0	3.58851	5.20552	3.19837	6.57135	6.90191	0.727522	low
TCGA-36-1576	2.50685	0	4.7181	6.51619	3.38609	6.83494	5.37504	1.39324	high
TCGA-36-1580	2.01918	1	4.05651	5.58066	3.04822	5.92158	6.91037	1.02943	high
TCGA-57-1583	0.947945	1	2.25152	3.41141	1.99717	2.55915	6.8815	0.801131	low
TCGA-57-1585	0.145205	1	4.05113	5.34463	3.53532	4.42989	5.02746	1.6834	high
TCGA-57-1993	2.09041	0	3.43467	5.57896	3.37975	2.67445	6.10721	2.08185	high
TCGA-5X-AA5U	0.989041	0	2.10755	2.40816	1.59613	1.79568	6.75232	0.723726	low
TCGA-61-1724	1.74521	1	3.20217	4.43478	2.04358	4.57928	4.43111	0.946857	low
TCGA-61-1736	4.06575	1	2.33953	4.659	1.72319	2.52196	4.61581	1.23021	high
TCGA-61-1737	3.73699	0	3.84272	5.75712	3.02127	4.22108	5.32852	1.6933	high
TCGA-61-1738	2.98356	1	2.40924	5.28939	6.35205	2.53816	2.18365	2.76086	high
TCGA-61-1741	2.80548	1	2.30153	4.20386	2.32163	5.85751	5.84238	0.483464	low
TCGA-61-1900	0.482192	0	2.05007	3.16627	4.11371	4.6163	3.52578	0.694565	low
TCGA-61-1910	3.08767	0	1.75789	3.96377	1.64059	2.79526	6.14927	0.754694	low
TCGA-61-1914	4.71781	0	2.49132	5.25658	2.75071	5.3174	7.98223	0.652458	low
TCGA-61-1918	1.31233	1	2.38732	5.21751	1.85256	4.37849	7.42592	0.746128	low
TCGA-61-1919	3.18082	1	3.96149	6.34315	4.21281	5.70815	7.72592	1.32556	high
TCGA-61-2003	0.334247	0	4.56991	5.80814	5.46794	4.28491	4.87047	2.74588	high
TCGA-61-2008	2.55342	0	3.05139	4.24574	1.6835	6.44444	4.94603	0.517193	low
TCGA-61-2012	2.55342	0	3.75714	5.70615	1.63558	6.51478	7.93871	0.67703	low
TCGA-61-2101	4.62466	1	3.32036	4.48623	2.87058	3.7697	9.18841	0.93724	low
TCGA-61-2109	1.72329	1	2.40884	4.4999	3.72686	2.1926	7.04442	1.36544	high
TCGA-61-2111	10.4795	0	3.13749	4.61216	5.5926	2.93047	1.63869	2.54365	high
TCGA-VG-A8LO	0.0657534	1	2.10555	3.16316	1.77328	2.34016	6.93156	0.749336	low
TCGA-WR-A838	0.832877	1	2.06825	2.28985	2.64817	1.55657	3.78379	1.0188	high
GSM657532	1.72	1	3.60948	5.83227	2.86921	3.30202	4.32554	2.12824	high
GSM657533	3.99	0	2.05459	4.79011	2.16882	9.44282	4.28629	0.237073	low
GSM657538	3.53	0	2.51966	4.87878	3.08628	3.22848	6.02275	1.1938	high
GSM657539	3.49	0	2.97068	3.95887	2.61289	5.53582	5.74406	0.617726	low
GSM657540	0.71	1	2.41702	3.0502	3.97174	2.389	5.08283	1.13025	high
GSM657548	3.55	1	2.87673	5.21686	2.29635	3.83817	8.12221	0.968462	low
GSM657550	1.47	1	2.48564	5.83745	2.23919	5.04174	5.06809	0.916558	low
GSM657551	6.86	0	2.20113	3.86633	1.65363	3.07958	3.92603	0.912172	low
GSM657552	2.37	1	2.63332	4.31232	4.09279	2.48462	6.11638	1.44244	high
GSM657553	3.7	0	4.14156	5.87153	4.11774	3.49989	5.61959	2.46215	high
GSM657565	2.16	1	3.13605	4.66679	3.4528	6.19545	4.68967	0.754037	low
GSM657566	2.27	0	3.217	3.6345	2.04861	3.92083	5.52667	0.870442	low
GSM657567	2.23	0	4.51555	6.37381	3.64337	6.87685	7.43956	1.12493	high
GSM657571	2.15	0	2.40313	6.87003	2.2959	3.33384	8.77566	1.30448	high
GSM657576	4.94	1	3.43667	4.28758	2.23066	4.1542	5.04684	1.05822	high
GSM657578	1.75	1	3.53638	5.39208	4.71823	4.04085	5.81155	1.74016	high
GSM657579	1.91	1	3.19816	4.10404	2.4477	2.78021	4.24924	1.43735	high
GSM657580	4.6	1	2.20659	4.11824	1.62387	3.22797	8.23341	0.684186	low
GSM657583	5.68	1	3.38219	6.08512	2.97868	6.27063	6.93129	0.869275	low
GSM657588	5.15	1	2.80728	6.11449	3.42313	7.70554	6.18524	0.584832	low
GSM657589	0.62	1	2.2723	3.7418	2.1404	3.80471	4.73044	0.756443	low
GSM657592	3.12	1	2.38938	3.9917	7.33905	4.76302	7.82471	0.909074	low
GSM657593	0.21	1	3.83478	5.62313	3.41668	5.2231	6.18402	1.2662	high
GSM657595	0.99	1	2.58006	4.29386	2.03638	2.73726	7.20097	0.993884	low
GSM657597	5.34	1	2.87673	4.596	3.34477	4.17519	5.23653	1.07123	high
GSM657598	6.83	1	3.60899	5.37654	3.34063	4.30595	7.91114	1.23779	high
GSM657601	1.94	1	2.48681	2.89483	1.98305	2.58452	6.19454	0.797184	low
GSM657605	7.88	1	2.85118	3.98091	1.89803	2.81737	4.66412	1.15733	high
GSM657606	3.93	1	2.75261	4.75186	2.59465	2.49181	8.18489	1.20527	high
GSM657609	9.22	1	3.36091	4.07204	2.87448	3.73169	6.51696	1.05775	high
GSM657610	3.75	1	2.31499	3.70251	2.72826	2.65317	3.597	1.1542	high
GSM657615	0.66	1	4.9972	4.45353	3.35193	5.25811	3.52082	1.60993	high
GSM657618	3.24	1	2.41587	3.71495	2.08592	4.95892	6.47789	0.5206	low
GSM657619	0.06	1	2.59101	3.59236	3.02537	2.42638	5.873	1.12809	high
GSM657621	2.99	1	2.74342	3.86107	3.96422	4.19437	8.06111	0.769398	low
GSM657623	4.83	1	2.32843	3.57422	2.65364	2.56567	4.84234	1.04623	high
GSM657624	4.12	1	2.72229	3.57111	2.65735	4.8744	4.53556	0.682191	low
GSM657625	1.56	1	3.46292	3.91805	1.70936	3.46061	9.10905	0.827694	low
GSM657626	3.99	1	2.20551	3.72961	2.10872	3.36434	5.72052	0.765703	low
GSM657627	0.31	1	3.47318	3.75425	4.02498	3.09283	5.34845	1.45744	high
GSM657631	4.39	0	3.2736	4.88748	2.34498	4.18278	5.26501	1.13826	high
GSM657633	6.51	1	2.84933	4.95426	3.86079	2.45387	6.09505	1.72629	high
GSM657635	2.74	1	2.41958	2.87306	2.28177	5.60855	7.16125	0.362508	low
GSM657636	1.47	1	1.7961	4.18607	2.23287	3.12866	6.48603	0.766864	low
GSM657637	0.97	1	5.60553	3.87536	5.29957	2.73906	3.56382	3.77282	high
GSM657639	3.97	1	3.35953	3.71434	2.71131	3.46261	3.34842	1.28505	high
GSM657640	1.69	1	3.88155	3.86054	2.84845	3.78603	4.29677	1.34116	high
GSM657644	10.04	0	2.79412	4.47735	3.26539	2.3593	5.36374	1.55458	high
GSM657645	0.59	1	2.92557	4.52444	4.05034	2.35418	6.41867	1.64302	high
GSM657646	3.68	1	2.17689	6.05905	1.61204	3.86816	5.96802	1.02955	high
GSM657649	1.1	1	5.49142	7.83682	7.16051	4.18891	4.74506	6.70075	high
GSM657650	2.57	1	2.05649	5.41495	2.38552	7.25467	7.89761	0.363925	low
GSM657651	1.97	1	2.59324	3.89598	1.84384	2.67917	9.26906	0.787229	low
GSM657653	13.46	0	2.61772	4.09565	1.01472	2.93024	8.55335	0.750111	low
GSM657655	2.62	1	2.42514	3.02242	1.92473	2.86155	4.73093	0.830271	low
GSM657656	3.74	1	2.53545	4.91666	1.90208	4.30866	7.39991	0.746302	low
GSM657657	2.53	1	2.61428	2.79564	3.81338	2.44505	6.37752	1.00052	low
GSM657662	5.9	1	2.03977	4.18607	2.33992	3.96408	5.13007	0.745643	low
GSM657663	4.88	1	3.46292	6.79004	3.42947	7.91189	7.23149	0.71366	low
GSM657665	7.22	1	3.28543	5.37072	2.07592	1.88252	4.57474	2.24752	high
GSM657666	5.41	1	1.89222	3.5061	2.26593	3.69751	8.60194	0.51348	low
GSM657667	10.73	0	2.42216	3.89779	1.86443	4.19165	8.64258	0.546965	low
GSM657668	7.43	1	2.23152	5.48489	1.95362	8.06727	8.30599	0.295706	low
GSM657681	2.18	1	2.84458	4.29013	2.69495	3.1006	4.94669	1.22859	high
GSM657682	8.82	1	2.39588	2.26056	1.7845	2.68811	6.55197	0.633008	low
GSM657685	6.88	1	2.29271	6.17461	4.29475	6.48462	6.57899	0.736807	low
GSM657686	5.63	1	2.65739	5.92597	2.07361	6.99624	5.18185	0.595783	low
GSM657689	6.54	1	2.65628	4.44256	1.28733	4.59779	7.8928	0.58878	low
GSM657690	0.79	1	3.64646	5.09987	3.63255	3.35203	4.36643	1.96448	high
GSM657692	4.55	1	2.9121	3.53371	2.61962	3.1401	4.61366	1.07199	high
GSM657702	7.97	0	2.39905	3.78868	2.28693	2.83946	4.50799	1.02938	high
GSM657706	1.12	1	2.88738	3.69078	4.55727	3.49563	6.95826	1.05065	high
